# Supplementary material for: EASY-NET Program: Effectiveness of an Audit and Feedback Intervention in the Emergency Care for Acute Conditions in the Lazio Region
Source: MDPI journal article supplement (doi:10.3390/healthcare12070733), 2024-03-27
Supplement: s1 [file s1]

## Sommario

|                                                                                                                                                                                                                                                  |    |
|--------------------------------------------------------------------------------------------------------------------------------------------------------------------------------------------------------------------------------------------------|----|
| <b>Table S1.</b> Detailed cardiovascular area (AMI/STEMI) indicators sheets.....                                                                                                                                                                 | 3  |
| <b>Table S2.</b> Detailed cerebrovascular area indicators sheet. ....                                                                                                                                                                            | 3  |
| <b>Table S3.</b> ICD-9-CM codes.....                                                                                                                                                                                                             | 5  |
| <b>Table S4.</b> List of participating facilities. ....                                                                                                                                                                                          | 7  |
| <b>Figure S1.</b> Flow chart of included Lazio facilities with AMI patients.....                                                                                                                                                                 | 7  |
| <b>Figure S2.</b> Flow chart of included Lazio facilities with STEMI patients. ....                                                                                                                                                              | 8  |
| <b>Figure S3.</b> Flow chart of included Lazio facilities with ischemic stroke patients. ....                                                                                                                                                    | 8  |
| <b>Table S5.</b> Distribution of patients belonging to the IMA cohorts by year of analysis and facility.....                                                                                                                                     | 9  |
| <b>Table S6.</b> Distribution of patients belonging to the STEMI cohorts by year of analysis.....                                                                                                                                                | 10 |
| and facility.....                                                                                                                                                                                                                                | 10 |
| <b>Table S7.</b> Distribution of patients belonging to stroke cohorts by year of analysis and.....                                                                                                                                               | 11 |
| facility (a and b). ....                                                                                                                                                                                                                         | 11 |
| <b>Table S8.</b> Characteristics of patients included in the AMI cohort in 2021 and 2022 from participating facilities according to A&F intervention exposure status. ....                                                                       | 12 |
| <b>Table S9.</b> Characteristics of patients included in the AMI cohort in 2021 (PRE) from participating facilities by 30-days mortality after first hospital admission in patients with AMI (Yes/No).....                                       | 12 |
| <b>Table S10.</b> Characteristics of patients included in the AMI cohort in 2022 (POST) from participating facilities by 30-days mortality after first hospital admission in patients with AMI (Yes/No).....                                     | 13 |
| <b>Table S11.</b> Characteristics of patients included in the STEMI cohort in 2021 and 2022 from participating facilities according to A&F intervention exposure status.....                                                                     | 15 |
| <b>Table S12.</b> Characteristics of patients included in the STEMI cohort in 2021 (PRE) from participating facilities according to performing of PTCA within 90 minutes of admission to the hospital ER (Yes/No).....                           | 16 |
| <b>Table S13.</b> Characteristics of patients included in the STEMI cohort in 2022 (POST) from participating facilities according to performing of PTCA within 90 minutes of admission to the hospital ER (Yes/No).....                          | 17 |
| <b>Table S14.</b> Characteristics of patients included in the ischemic stroke cohort (in hospital mortality) in 2021 and 2022 from participating facilities according to A&F intervention exposure status. ....                                  | 18 |
| <b>Table S15.</b> Characteristics of patients included in the ischemic stroke cohort in 2021 (PRE) from participating facilities by in hospital 30-days mortality since first hospital admission in patients with ischemic stroke (Yes/No).....  | 19 |
| <b>Table S16.</b> Characteristics of patients included in the ischemic stroke cohort in 2022 (POST) from participating facilities by in hospital 30-days mortality since first hospital admission in patients with ischemic stroke (Yes/No)..... | 20 |
| <b>Table S17.</b> Characteristics of patients included in the ischemic stroke cohort (hospital readmissions) in 2021 and 2022 from participating facilities according to A&F intervention exposure status. ....                                  | 21 |
| <b>Table S18.</b> Characteristics of patients included in the stroke cohort in 2021 (PRE) from participating facilities according to in hospital readmissions within 30-days of discharge for ischemic stroke (Yes/No).....                      | 22 |

**Table S19.** Characteristics of patients included in the stroke cohort in 2022 (POST) from participating facilities according to in hospital readmissions within 30-days of discharge for ischemic stroke (Yes/No).....23

**Table S1.** Detailed cardiovascular area (AMI/STEMI) indicators sheets.

|           |                                                                                                                                                                                                                                                                                                                                                                                                                                                                                                                                                                                                                                                                                                                                                                                                                                                                                                                                                                                                                                                                                                                                        |
|-----------|----------------------------------------------------------------------------------------------------------------------------------------------------------------------------------------------------------------------------------------------------------------------------------------------------------------------------------------------------------------------------------------------------------------------------------------------------------------------------------------------------------------------------------------------------------------------------------------------------------------------------------------------------------------------------------------------------------------------------------------------------------------------------------------------------------------------------------------------------------------------------------------------------------------------------------------------------------------------------------------------------------------------------------------------------------------------------------------------------------------------------------------|
| INDICATOR | <b>30-days mortality after first hospital admission of patients with AMI</b>                                                                                                                                                                                                                                                                                                                                                                                                                                                                                                                                                                                                                                                                                                                                                                                                                                                                                                                                                                                                                                                           |
| DIMENSION | Outcome                                                                                                                                                                                                                                                                                                                                                                                                                                                                                                                                                                                                                                                                                                                                                                                                                                                                                                                                                                                                                                                                                                                                |
| RATIONAL  | <p>Timely and effective treatments are essential for the survival of the acute myocardial infarction (AMI) patient, particularly in the case of a STEMI. Mortality at 30-days after IMA is considered a valid and reproducible indicator of the appropriateness and effectiveness of the diagnostic-therapeutic process that begins with hospitalization. With the widespread use of fibrinolytic drugs, aspirin, and coronary revascularization interventions, mortality has gone from 18% to 6-7% in the past 30 years. Reperfusion therapy, if implemented correctly and with the necessary timeliness, results in both decreased mortality and improved short- and long-term prognosis.</p> <p>However, the choice of treatment pathway should be made even before arrival at the hospital taking into account the characteristics of the available organization and the patient's clinical picture, based on which to perform risk stratification.</p> <p><a href="https://www.dep.lazio.it/prevale2022/documenti/razionali/definizione_1.pdf">https://www.dep.lazio.it/prevale2022/documenti/razionali/definizione_1.pdf</a></p> |
| YEAR/S    | 2021,2022                                                                                                                                                                                                                                                                                                                                                                                                                                                                                                                                                                                                                                                                                                                                                                                                                                                                                                                                                                                                                                                                                                                              |
| STANDARD  | Nd; analysis by volume classes                                                                                                                                                                                                                                                                                                                                                                                                                                                                                                                                                                                                                                                                                                                                                                                                                                                                                                                                                                                                                                                                                                         |
| PROTOCOL  | <a href="https://www.dep.lazio.it/prevale2022/documenti/protocolli/pro_1.pdf">https://www.dep.lazio.it/prevale2022/documenti/protocolli/pro_1.pdf</a>                                                                                                                                                                                                                                                                                                                                                                                                                                                                                                                                                                                                                                                                                                                                                                                                                                                                                                                                                                                  |

|           |                                                                                                                                                                                                                                                                                                                                                                                                                                                                                                                                                                                                        |
|-----------|--------------------------------------------------------------------------------------------------------------------------------------------------------------------------------------------------------------------------------------------------------------------------------------------------------------------------------------------------------------------------------------------------------------------------------------------------------------------------------------------------------------------------------------------------------------------------------------------------------|
| INDICATOR | <b>Proportion of PTCA performed in STEMI patients within 90 min of admission to the hospital ER</b>                                                                                                                                                                                                                                                                                                                                                                                                                                                                                                    |
| DIMENSION | Timeliness                                                                                                                                                                                                                                                                                                                                                                                                                                                                                                                                                                                             |
| RATIONAL  | <p>In patients with STEMI, PTCA is considered the treatment of choice when it can be performed by expert personnel, in an appropriate Cath laboratory, within 90 minutes of the first contact with the Health Service. In fact, the literature has demonstrated the inverse relationship between the timeliness of execution of the procedure in patients with AMI (door-to-balloon time) and short-term mortality.</p> <p><a href="https://www.dep.lazio.it/prevale2022/documenti/razionali/definizione_610.pdf">https://www.dep.lazio.it/prevale2022/documenti/razionali/definizione_610.pdf</a></p> |
| YEAR/S    | 2021,2022                                                                                                                                                                                                                                                                                                                                                                                                                                                                                                                                                                                              |
| STANDARD  | ≥60% (DM 70/2015; DCA 412/2014)                                                                                                                                                                                                                                                                                                                                                                                                                                                                                                                                                                        |
| PROTOCOL  | <a href="https://www.dep.lazio.it/prevale2022/documenti/protocolli/pro_610.pdf">https://www.dep.lazio.it/prevale2022/documenti/protocolli/pro_610.pdf</a>                                                                                                                                                                                                                                                                                                                                                                                                                                              |

**Table S2.** Detailed cerebrovascular area indicators sheet.

|           |                                                                                                                                                                                                           |
|-----------|-----------------------------------------------------------------------------------------------------------------------------------------------------------------------------------------------------------|
| INDICATOR | <b>30-days in hospital mortality after first hospital admission in patients with ischemic stroke</b><br><br><b>Proportion of in hospital readmissions within 30-days of discharge for ischemic stroke</b> |
| DIMENSION | Outcome                                                                                                                                                                                                   |
| RATIONAL  | Individuals with stroke are at increased risk of adverse outcomes following the acute event including death but also recurrence, disability, complications, and general clinical deterioration.           |

|          |                                                                                                                                                                                                                                                                                                                                                                                                                                                                                                                                                                                                                                                                                                                                                                                                                                                                                                                                                                                                                                                                                                                                                                                                                                                                                                                                                 |
|----------|-------------------------------------------------------------------------------------------------------------------------------------------------------------------------------------------------------------------------------------------------------------------------------------------------------------------------------------------------------------------------------------------------------------------------------------------------------------------------------------------------------------------------------------------------------------------------------------------------------------------------------------------------------------------------------------------------------------------------------------------------------------------------------------------------------------------------------------------------------------------------------------------------------------------------------------------------------------------------------------------------------------------------------------------------------------------------------------------------------------------------------------------------------------------------------------------------------------------------------------------------------------------------------------------------------------------------------------------------|
|          | <p>Mortality at 30-days after hospitalization for stroke is internationally considered a valid and reproducible indicator of the appropriateness and effectiveness of the diagnostic-therapeutic process.</p> <p>Given the likelihood of recurrence, "hospital readmissions at 30-days after treatment for ischemic stroke" also represents a short-term, measurable health outcome. Recurrences may be associated with disease progression but may also depend on the quality of both intra- and extrahospital care processes. The rate of rehospitalizations 30-days after a hospital discharge can, therefore, be a valid indicator of the quality of care provided. There is evidence in the literature that improvements in discharge processes can, for example, reduce the rate of hospital readmissions. These also expose the patient to additional risk of hospital infections and complications in general as well as incurring additional costs for hospitals. Monitoring this outcome offers the possibility of identifying opportunities for improvement in the care process, in this case intrahospital, and achieving better patient outcomes.</p> <p><a href="https://www.dep.lazio.it/prevale2022/documenti/razionali/definizione_18.pdf">https://www.dep.lazio.it/prevale2022/documenti/razionali/definizione_18.pdf</a></p> |
| YEAR/S   | 2021,2022                                                                                                                                                                                                                                                                                                                                                                                                                                                                                                                                                                                                                                                                                                                                                                                                                                                                                                                                                                                                                                                                                                                                                                                                                                                                                                                                       |
| STANDARD | nd;                                                                                                                                                                                                                                                                                                                                                                                                                                                                                                                                                                                                                                                                                                                                                                                                                                                                                                                                                                                                                                                                                                                                                                                                                                                                                                                                             |
| PROTOCOL | <p><a href="https://www.dep.lazio.it/prevale2022/documenti/protocolli/pro_19.pdf">https://www.dep.lazio.it/prevale2022/documenti/protocolli/pro_19.pdf</a></p> <p><a href="https://www.dep.lazio.it/prevale2022/documenti/protocolli/pro_18.pdf">https://www.dep.lazio.it/prevale2022/documenti/protocolli/pro_18.pdf</a></p>                                                                                                                                                                                                                                                                                                                                                                                                                                                                                                                                                                                                                                                                                                                                                                                                                                                                                                                                                                                                                   |

**Table S3.** ICD-9-CM codes.

| Indicators                                                                                                       | Calculation                                                                                                                                                                                                                               | Data sources            | ICD9-CM primary or secondary diagnoses codes                                                                                                    |                                                                                                                                                                                | ICD9-CM procedures codes                |
|------------------------------------------------------------------------------------------------------------------|-------------------------------------------------------------------------------------------------------------------------------------------------------------------------------------------------------------------------------------------|-------------------------|-------------------------------------------------------------------------------------------------------------------------------------------------|--------------------------------------------------------------------------------------------------------------------------------------------------------------------------------|-----------------------------------------|
|                                                                                                                  |                                                                                                                                                                                                                                           |                         | Inclusion                                                                                                                                       | Exclusion                                                                                                                                                                      | Inclusion                               |
| STEMI: Proportion of PTCA performed in STEMI patients within 90 min of admission to the hospital ER              | Number of hospitalized patients diagnosed with STEMI who received PTCA within 90 minutes from access to ER / Number of hospitalization of patients diagnosed with STEMI                                                                   | HDR, HEIS               | 410.XX<br>411, 413, 414, 423.0, 426, 427, 428, 429.5, 429.6, 429.71, 429.79, 429.81, 518.4, 518.81, 780.01, 780.2, 785.51, 799.1, 997.02, 998.2 | 410.7X, 410.9.X<br>427.5                                                                                                                                                       | 00.66, 36.01, 36.02, 36.05, 36.06 36.07 |
| AMI: 30-days mortality after first hospital admission of patients with AMI                                       | Number of hospitalized patients diagnosed with STEMI who died during the 30-days after hospital admission/ Number of hospitalized patients diagnosed with AMI                                                                             | HDR, HEIS, Tax Registry |                                                                                                                                                 |                                                                                                                                                                                |                                         |
| Ischemic Stroke: intrahospital 30-days mortality after first hospital admission in patients with ischemic stroke | Number of admissions with a principal diagnosis of ischemic stroke in which the patient is found to have died within thirty days from the date of first admission/Number of hospitalizations with principal diagnosis of ischemic stroke. | HDR, HEIS, Tax Registry | 433.x1, 434.x1, 436                                                                                                                             | 430,431,432.X<br>290-319<br>140.0-208.9<br><br>Admissions preceded by another hospitalization with a stroke diagnosis within 1 year from the date of first admission (430,431, | 72-75                                   |

|                                                                                           |                                                                                                                                                                                                                            |            |                     |                                                                                                                                                                                                      |       |
|-------------------------------------------------------------------------------------------|----------------------------------------------------------------------------------------------------------------------------------------------------------------------------------------------------------------------------|------------|---------------------|------------------------------------------------------------------------------------------------------------------------------------------------------------------------------------------------------|-------|
|                                                                                           |                                                                                                                                                                                                                            |            |                     | 432.X, 433.x1, 434.x1, 436)                                                                                                                                                                          |       |
| Ischemic Stroke: in hospital readmissions within 30-days of discharge for ischemic stroke | Number of hospitalizations followed within 30-days from the date of discharge by at least one hospitalization ordinary acute care hospital admission/ Number hospitalizations with principal diagnosis of ischemic stroke. | HDR, HEIS, | 433.x1, 434.x1, 436 | 430,431,432.X 290-319 140.0-208.9<br><br>Admissions preceded by another hospitalization with a stroke diagnosis within 1 year from the date of first admission (430,431, 432.X, 433.x1, 434.x1, 436) | 72-75 |

STEMI: ST Elevation Myocardial Infarction

PTCA: Percutaneous Transluminal Coronary Angioplasty

ER: Emergency Room

HEIS: Healthcare Emergency Information System

HDR: Italian Hospital Discharge Registry

**Table S4.** List of participating facilities.

| PATHWAYS                 |                                          |                                       |
|--------------------------|------------------------------------------|---------------------------------------|
|                          | AMI                                      | Ischemic stroke                       |
| Participating facilities | Osp. S. Spirito (ASL Roma 1)             | Osp. S. Spirito (ASL Roma 1)          |
|                          | Osp. S. Eugenio-CTO (ASL Roma 2)         | Osp. S. Eugenio-CTO (ASL Roma 2)      |
|                          | Osp. G. Grassi (ASL Roma 3)              | Osp. G. Grassi (ASL Roma 3)           |
|                          | Osp. S. Paolo (ASL Roma 4)               | Osp. S. Paolo (ASL Roma 4)            |
|                          | Osp. L. Parodi Delfino (ASL Roma 5)      | Osp. L. Parodi Delfino (ASL Roma 5)   |
|                          | Nuovo Ospedale dei Castelli (ASL Roma 6) |                                       |
|                          | Osp. S. Maria Goretti (ASL Latina)       | Osp. S. Maria Goretti (ASL Latina)    |
|                          | Osp. F. Spaziani (ASL Frosinone)         |                                       |
|                          | Osp. S. Camillo De Lellis (ASL Rieti)    | Osp. S. Camillo De Lellis (ASL Rieti) |
|                          | Osp. Di Belcolle (ASL Viterbo)           | Osp. Di Belcolle (ASL Viterbo)        |
|                          | A.O.U.U. S. Andrea                       | A.O.U.U. S. Andrea                    |
|                          | Pol. U. A. Gemelli                       | Pol. U. A. Gemelli                    |
|                          | Osp. S. Carlo di Nancy                   | Osp. S. Carlo di Nancy                |
|                          | A.O. S. Camillo Forlanini                |                                       |
|                          | Osp. S. Pertini                          |                                       |
|                          | Osp. M.G. Vannini                        |                                       |
|                          |                                          | A.O.U.U. Umberto I                    |
|                          |                                          | A.O.U.U. Tor Vergata                  |

**Figure S1.** Flow chart of included Lazio facilities with AMI patients.

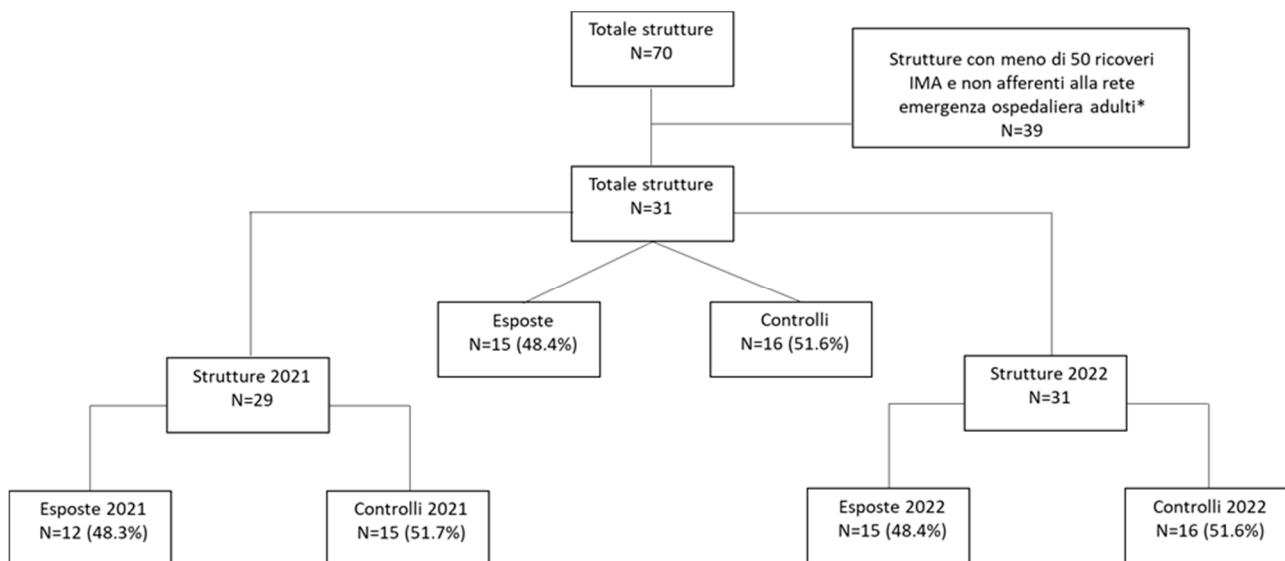

\* <https://www.regione.lazio.it/enti/salute/sistemi-emergenza/rete-emergenza-ospedaliera>

**Figure S2.** Flow chart of included Lazio facilities with STEMI patients.

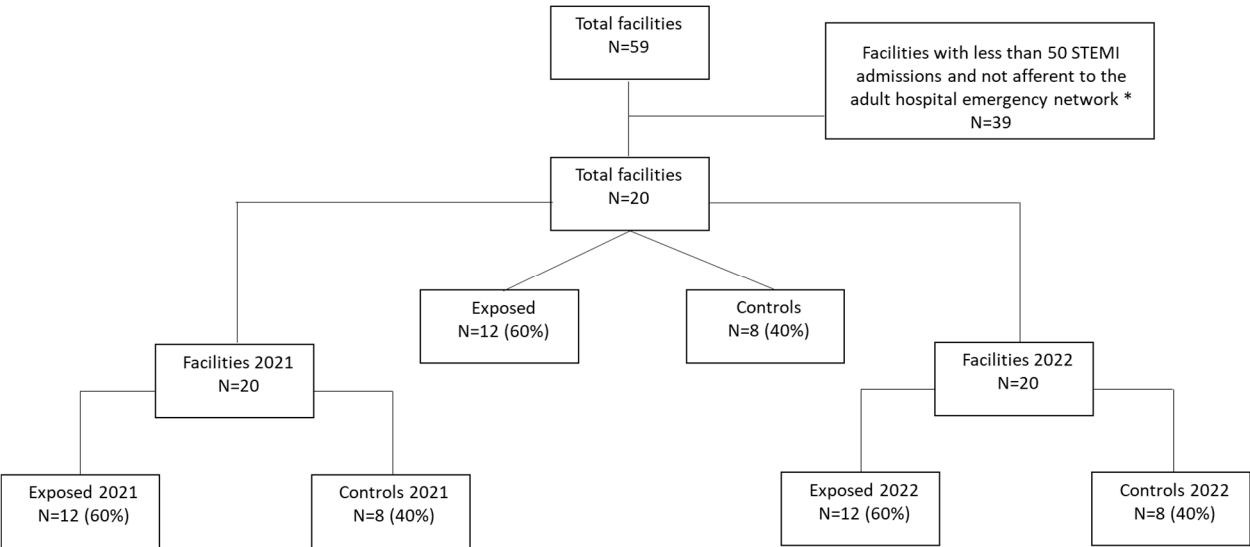

\* <https://www.regione.lazio.it/enti/salute/sistemi-emergenza/rete-emergenza-ospedaliera>

**Figure S3.** Flow chart of included Lazio facilities with ischemic stroke patients.

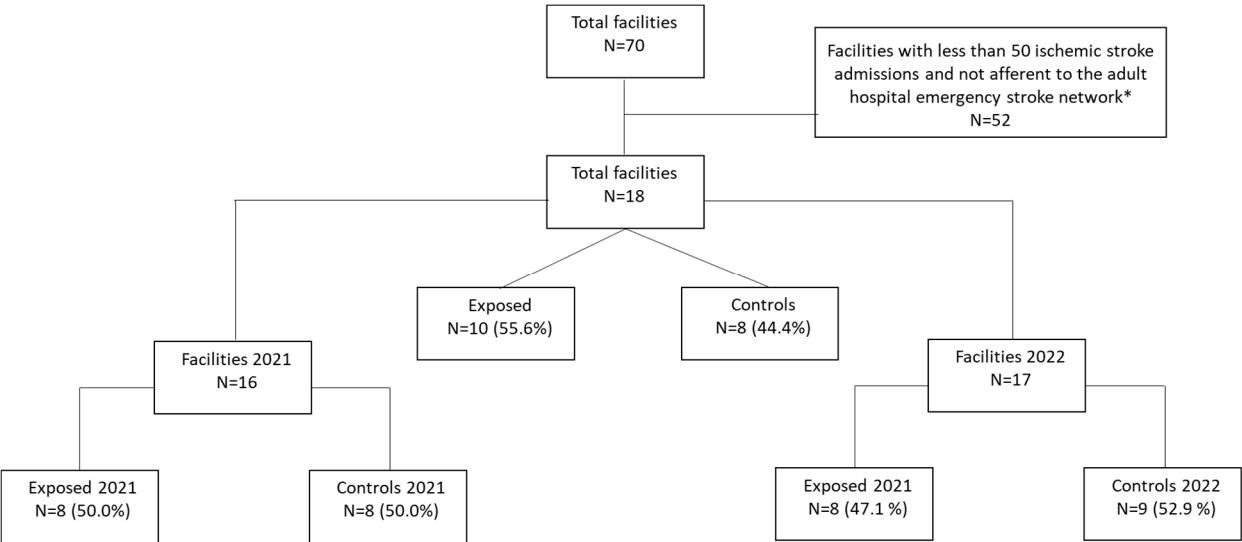

\* <https://www.regione.lazio.it/enti/salute/sistemi-emergenza/rete-ictus->



**Table S5.** Distribution of patients belonging to the IMA cohorts by year of analysis and facility.

| FACILITIES                              | PRE-2021           | POST-2022          | Total             |
|-----------------------------------------|--------------------|--------------------|-------------------|
|                                         | N (col%)           | N (col%)           | N (col%)          |
|                                         | 5986 (49.1)        | 6210 (50.9)        | 12196 (100)       |
| <b>EXPOSED</b>                          | <b>3393 (48.5)</b> | <b>3609 (51.5)</b> | <b>7002 (100)</b> |
| A.O. S.CAMILLO FORLANINI                | 289 (8.5)          | 321 (8.9)          | 610 (8.7)         |
| A.O.U.U. S.ANDREA                       | 354 (10.4)         | 345 (9.6)          | 699 (10.0)        |
| NUOVO OSPEDALE DEI CASTELLI             | –                  | 111 (3.1)          | 111 (1.6)         |
| OSP. DI BELCOLLE                        | 386 (11.4)         | 366 (10.1)         | 752 (10.7)        |
| OSP. F.SPAZIANI                         | 301 (8.9)          | 310 (8.6)          | 611 (8.7)         |
| OSP. G.GRASSI                           | 261 (7.9)          | 256 (7.1)          | 517 (7.4)         |
| OSP. L.PARODI DELFINO                   | 70 (2.1)           | 61 (1.7)           | 131 (1.9)         |
| OSP. S.CAMILLO DE LELLIS                | 260 (7.7)          | 208 (5.8)          | 468 (6.7)         |
| OSP. S.EUGENIO                          | 182 (5.4)          | 178 (4.9)          | 360 (5.1)         |
| OSP. S.MARIA GORETTI                    | 419 (12.4)         | 448 (12.4)         | 867 (12.4)        |
| OSP. S.PAULO                            | 40 (1.2)           | 51 (1.4)           | 91 (1.3)          |
| OSP. S.PERTINI                          | 232 (6.8)          | 260 (7.2)          | 492 (7.0)         |
| OSP. S.SPIRITO                          | 177 (5.3)          | 210 (5.8)          | 387 (5.5)         |
| OSP.C. G.VANNINI                        | 102 (3.1)          | 204 (5.7)          | 306 (4.4)         |
| POL.U. A.GEMELLI                        | 320 (9.4)          | 280 (7.8)          | 600 (8.6)         |
| <b>CONTROLS</b>                         | <b>2593 (49.9)</b> | <b>2601 (50.1)</b> | <b>5194 (100)</b> |
| A.O. S.GIOVANNI ADDOLORATA              | 223 (8.6)          | 208 (8.0)          | 431 (8.3)         |
| A.O.U.U. TOR VERGATA                    | 385 (14.85)        | 344 (13.2)         | 729 (14.0)        |
| A.O.U.U. UMBERTO I                      | 184 (7.1)          | 168 (6.5)          | 352 (6.8)         |
| C.C.A. AURELIA HOSPITAL                 | 202 (7.79)         | 168 (6.5)          | 370 (7.1)         |
| C.C.A.S.ANNA                            | 101 (3.9)          | 86 (3.3)           | 187 (3.6)         |
| OSP. DI ANZIO E NETTUNO                 | 48 (1.85)          | 33 (1.3)           | 81 (1.6)          |
| OSP. DONO SVIZZERO                      | 245 (9.45)         | 257 (9.9)          | 502 (9.7)         |
| OSP. S.GIOVANNI EVENGELISTA             | 155 (5.98)         | 188 (7.2)          | 343 (6.6)         |
| OSP. S.SCOLASTICA                       | 43 (1.66)          | 51 (2.0)           | 94 (1.8)          |
| OSP. S.SEBASTIANO                       | 99 (3.82)          | 61 (2.4)           | 160 (3.1)         |
| OSP. SS.TRINITA'                        | 61 (2.35)          | 60 (2.1)           | 121 (2.3)         |
| OSP.C. S.PIETRO FATEBENEFRAELLI         | 176 (6.79)         | 238 (9.2)          | 414 (8.0)         |
| OSPEDALE FATEBENEFRAELLI-ISOLA TIBERINA | –                  | 78 (3.0)           | 78 (1.5)          |
| POL.U. CAMPUS BIOMEDICO                 | 66 (2.55)          | 103 (3.7)          | 169 (3.3)         |
| POLICLINICO CASILINO                    | 342 (13.19)        | 300 (11.3)         | 642 (12.4)        |
| PRESIDIO OSPEDALIERO SAN FILIPPO NERI   | 263 (10.14)        | 258 (9.2)          | 521 (10.0)        |

**Table S6.** Distribution of patients belonging to the STEMI cohorts by year of analysis and facility.

| FACILITIES                            | PRE-2021           | POST-2022          | Totale            |
|---------------------------------------|--------------------|--------------------|-------------------|
|                                       | N(col%)            | N(col%)            | N(col%)           |
|                                       | 2433 (47.8)        | 2651 (52.5)        | 5084 (100)        |
| <b>EXPOSED</b>                        | <b>1541 (47.1)</b> | <b>1731 (52.9)</b> | <b>3272 (100)</b> |
| A.O. S.CAMILLO FORLANINI              | 136 (8.8)          | 160 (9.2)          | 296 (9.1)         |
| A.O.U.U. S.ANDREA                     | 164 (10.6)         | 172 (9.9)          | 336 (10.3)        |
| OSP. DI BELCOLLE                      | 161 (10.5)         | 166 (9.6)          | 327 (10.0)        |
| OSP. F.SPAZIANI                       | 206 (13.4)         | 198 (11.4)         | 404 (12.4)        |
| OSP. G.GRASSI                         | 110 (7.1)          | 109 (6.3)          | 219 (6.7)         |
| OSP. S.CAMILLO DE LELLIS              | 71 (4.6)           | 80 (4.6)           | 151 (4.6)         |
| OSP. S.EUGENIO                        | 108 (7.0)          | 108 (6.2)          | 216 (6.6)         |
| OSP. S.MARIA GORETTI                  | 201 (13.0)         | 249 (14.4)         | 450 (13.8)        |
| OSP. S.PERTINI                        | 122 (7.9)          | 143 (8.3)          | 265 (8.1)         |
| OSP. S.SPIRITO                        | 55 (3.6)           | 76 (4.4)           | 131 (4.0)         |
| OSP.C. G.VANNINI                      | 39 (2.5)           | 81 (4.7)           | 120 (3.7)         |
| POL.U. A.GEMELLI                      | 168 (10.9)         | 189 (10.9)         | 357 (10.9)        |
| <b>CONTROLS</b>                       | <b>892 (49.2)</b>  | <b>920 (50.8)</b>  | <b>1812 (100)</b> |
| A.O. S.GIOVANNI ADDOLORATA            | 82 (9.2)           | 89 (9.7)           | 171 (9.4)         |
| A.O.U.U. TOR VERGATA                  | 224 (25.1)         | 250 (27.2)         | 474 (26.2)        |
| A.O.U.U. UMBERTO I                    | 124 (13.9)         | 99 (10.7)          | 223 (12.3)        |
| OSP. DONO SVIZZERO                    | 94 (10.5)          | 117 (12.7)         | 211 (11.6)        |
| OSP. S.GIOVANNI EVANGELISTA           | 82 (9.2)           | 87 (9.5)           | 169 (9.3)         |
| OSP.C. S.PIETRO FATEBENEFRAELLI       | 58 (6.5)           | 67 (7.8)           | 125 (6.9)         |
| POLICLINICO CASILINO                  | 168 (18.8)         | 155 (16.9)         | 323 (17.8)        |
| PRESIDIO OSPEDALIERO SAN FILIPPO NERI | 60 (6.7)           | 56 (6.1)           | 116 (6.4)         |

**Table S7.** Distribution of patients belonging to stroke cohorts by year of analysis and facility (a and b).

a) Intrahospital mortality within 30-days after first hospital admission for ischemic stroke.

| FACILITIES                            | PRE-2021           | PRE-2022           | Totale            |
|---------------------------------------|--------------------|--------------------|-------------------|
|                                       | N(col%)            | N(col%)            | N(col%)           |
| <b>EXPOSED</b>                        | <b>2954 (49.7)</b> | <b>2995 (50.3)</b> | <b>5949 (100)</b> |
| A.O.U.U. S.ANDREA                     | 206 (10.9)         | 200 (10.5)         | 406 (10.7)        |
| A.O.U.U. TOR VERGATA                  | 448 (23.8)         | 419 (22.0)         | 867 (22.9)        |
| A.O.U.U. UMBERTO I                    | 308 (16.3)         | 350 (18.3)         | 658 (17.4)        |
| OSP. DI BELCOLLE                      | 167 (8.9)          | 191 (10.0)         | 358 (9.5)         |
| OSP. S.CAMILLO DE LELLIS              | 88 (4.7)           | 89 (4.7)           | 177 (4.7)         |
| OSP. S.EUGENIO                        | 167 (8.9)          | 118 (6.2)          | 285 (7.5)         |
| OSP. S.MARIA GORETTI                  | 149 (7.9)          | 225 (11.8)         | 374 (9.9)         |
| POL.U. A.GEMELLI                      | 352 (18.7)         | 316 (16.6)         | 668 (17.6)        |
| <b>CONTROLS</b>                       | <b>1069 (49.6)</b> | <b>1087 (50.4)</b> | <b>2156 (100)</b> |
| A.O. S.CAMILLO FORLANINI              | 260 (24.3)         | 245 (22.5)         | 505 (23.4)        |
| A.O. S.GIOVANNI ADDOLORATA            | 278 (26.0)         | 226 (20.8)         | 504 (23.4)        |
| NUOVO OSPEDALE DEI CASTELLI           | —                  | 56 (5.2)           | 56 (2.6)          |
| OSP. DONO SVIZZERO                    | 46 (4.3)           | 48 (4.4)           | 94 (4.4)          |
| OSP. F.SPAZIANI                       | 107 (10.0)         | 116 (10.7)         | 223 (10.3)        |
| OSP. SS.TRINITA'                      | —                  | 79 (7.3)           | 79 (3.7)          |
| OSP.C. S.PIETRO FATEBENEFRAELLI       | 46 (4.3)           | —                  | 46 (2.1)          |
| POL.U. CAMPUS BIOMEDICO               | 208 (19.5)         | 198 (18.2)         | 406 (18.8)        |
| POLICLINICO CASILINO                  | 45 (4.2)           | 36 (3.3)           | 81 (3.8)          |
| PRESIDIO OSPEDALIERO SAN FILIPPO NERI | 79 (7.4)           | 83 (7.6)           | 162 (7.5)         |

b) Hospital readmissions within 30-days after discharge for ischemic stroke.

| FACILITIES                            | PRE-2021           | PRE-2022           | Totale            |
|---------------------------------------|--------------------|--------------------|-------------------|
|                                       | N(col%)            | N(col%)            | N(col%)           |
| <b>EXPOSED</b>                        | <b>2685 (49.2)</b> | <b>2768 (50.8)</b> | <b>5453(100)</b>  |
| A.O.U.U. S.ANDREA                     | 186 (10.9)         | 182 (10.4)         | 368 (10.6)        |
| A.O.U.U. TOR VERGATA                  | 424 (24.8)         | 398 (22.6)         | 822 (23.7)        |
| A.O.U.U. UMBERTO I                    | 271 (15.8)         | 315 (17.9)         | 586 (16.9)        |
| OSP. DI BELCOLLE                      | 155 (9.1)          | 184 (10.5)         | 339 (9.8)         |
| OSP. S.CAMILLO DE LELLIS              | 82 (4.8)           | 76 (4.3)           | 158 (4.6)         |
| OSP. S.EUGENIO                        | 154 (9.0)          | 108 (6.1)          | 262 (7.6)         |
| OSP. S.MARIA GORETTI                  | 129 (7.5)          | 197 (11.2)         | 326 (9.4)         |
| POL.U. A.GEMELLI                      | 310 (18.2)         | 300 (17.1)         | 610 (17.6)        |
| <b>CONTROLS</b>                       | <b>974 (49.1)</b>  | <b>1008 (50.9)</b> | <b>1982 (100)</b> |
| A.O. S.CAMILLO FORLANINI              | 236 (24.3)         | 224 (22.2)         | 460 (23.2)        |
| A.O. S.GIOVANNI ADDOLORATA            | 245 (25.2)         | 204 (20.2)         | 449 (22.7)        |
| NUOVO OSPEDALE DEI CASTELLI           | —                  | 54 (5.4)           | 54 (2.7)          |
| OSP. DONO SVIZZERO                    | 39 (4.0)           | 48 (4.8)           | 87 (4.4)          |
| OSP. F.SPAZIANI                       | 98 (10.1)          | 106 (10.5)         | 204 (10.3)        |
| OSP. SS.TRINITA'                      | —                  | 64 (6.4)           | 64 (3.2)          |
| OSP.C. S.PIETRO FATEBENEFRAELLI       | 46 (4.7)           | —                  | 46 (2.3)          |
| POL.U. CAMPUS BIOMEDICO               | 201 (20.6)         | 193 (19.2)         | 394 (19.9)        |
| POLICLINICO CASILINO                  | 40 (4.1)           | 35 (3.5)           | 75 (3.8)          |
| PRESIDIO OSPEDALIERO SAN FILIPPO NERI | 69 (7.1)           | 80 (7.9)           | 149 (7.5)         |

## AMI patient cohort

**Table S8.** Characteristics of patients included in the AMI cohort in 2021 and 2022 from participating facilities according to A&F intervention exposure status.

|                                                                  | Exposed     |      |      | Control     |      |      | Total        |      | $\chi^2$<br>P-value |
|------------------------------------------------------------------|-------------|------|------|-------------|------|------|--------------|------|---------------------|
|                                                                  | N           | col% | row% | N           | col% | row% | N            | col% |                     |
| <b>Total</b>                                                     | <b>7002</b> |      |      | <b>5194</b> |      |      | <b>12196</b> |      |                     |
| <b>Sex</b>                                                       |             |      |      |             |      |      |              |      | 0.073               |
| Female                                                           | 2025        | 28.9 | 56.2 | 1580        | 30.4 | 43.8 | 3605         | 29.6 |                     |
| Male                                                             | 4977        | 71.1 | 57.9 | 3614        | 69.6 | 42.1 | 8591         | 70.4 |                     |
| <b>Age (years)</b>                                               |             |      |      |             |      |      |              |      | 0.959               |
| 19-59                                                            | 1778        | 25.4 | 57.5 | 1315        | 25.3 | 42.5 | 3093         | 25.4 |                     |
| 60-69                                                            | 1760        | 25.1 | 57.4 | 1308        | 25.2 | 42.6 | 3068         | 25.2 |                     |
| 70-79                                                            | 1741        | 24.9 | 57.7 | 1274        | 24.5 | 42.3 | 3015         | 24.7 |                     |
| 80-100                                                           | 1723        | 24.6 | 57.1 | 1297        | 25.0 | 42.9 | 3020         | 24.8 |                     |
| <b>Education level</b>                                           |             |      |      |             |      |      |              |      | 0.971               |
| Degree                                                           | 724         | 10.3 | 58.2 | 520         | 10.0 | 41.8 | 1244         | 10.2 |                     |
| Lower middle high school                                         | 2269        | 32.4 | 57.5 | 1677        | 32.3 | 42.5 | 3946         | 32.4 |                     |
| Middle high school                                               | 1989        | 28.4 | 57.4 | 1479        | 28.5 | 42.6 | 3468         | 28.4 |                     |
| None or elementary                                               | 1729        | 24.7 | 57.0 | 1303        | 25.1 | 43.0 | 3032         | 24.9 |                     |
| Not stated                                                       | 291         | 4.2  | 57.5 | 215         | 4.1  | 42.5 | 506          | 4.2  |                     |
| <b>Concomitant clinical conditions</b>                           |             |      |      |             |      |      |              |      |                     |
| Cancer                                                           | 383         | 5.5  | 56.8 | 291         | 5.6  | 43.2 | 674          | 5.5  | 0.751               |
| Diabetes                                                         | 400         | 5.7  | 55.4 | 322         | 6.2  | 44.6 | 722          | 5.9  | 0.260               |
| Lipid metabolism disorders                                       | 187         | 2.7  | 52.8 | 167         | 3.2  | 47.2 | 354          | 2.9  | 0.077               |
| Obesity                                                          | 34          | 0.5  | 51.5 | 32          | 0.6  | 48.5 | 66           | 0.5  | 0.331               |
| Obesity at index admission                                       | 324         | 4.6  | 60.2 | 214         | 4.1  | 39.8 | 538          | 4.4  | 0.178               |
| Anaemia                                                          | 173         | 2.5  | 53.1 | 153         | 3.0  | 46.9 | 326          | 2.7  | 0.108               |
| Anaemia at index admission                                       | 323         | 4.6  | 57.9 | 235         | 4.5  | 42.1 | 558          | 4.6  | 0.817               |
| Coagulation defects                                              | 4           | 0.1  | 66.7 | 2           | 0.0  | 33.3 | 6            | 0.1  | 0.647               |
| Coagulation defects at index admission                           | 2           | 0.0  | 66.7 | 1           | 0.0  | 33.3 | 3            | 0.0  | 0.746               |
| Other haematological diseases                                    | 15          | 0.2  | 48.4 | 16          | 0.3  | 51.6 | 31           | 0.3  | 0.309               |
| Other haematological diseases at index admission                 | 28          | 0.4  | 60.9 | 18          | 0.4  | 39.1 | 46           | 0.4  | 0.635               |
| Arterial hypertension                                            | 666         | 9.5  | 53.8 | 571         | 11.0 | 46.2 | 1237         | 10.1 | 0.007               |
| Previous myocardial infarction                                   | 547         | 7.8  | 57.6 | 402         | 7.7  | 42.4 | 949          | 7.8  | 0.883               |
| Other forms of ischemic heart disease                            | 567         | 8.1  | 57.0 | 428         | 8.2  | 43.0 | 995          | 8.2  | 0.776               |
| Heart failure                                                    | 300         | 4.3  | 55.4 | 242         | 4.7  | 44.6 | 542          | 4.4  | 0.321               |
| Not well-defined forms and complications of heart disease        | 41          | 0.6  | 54.7 | 34          | 0.7  | 45.3 | 75           | 0.6  | 0.630               |
| Rheumatic heart disease                                          | 24          | 0.3  | 55.8 | 19          | 0.4  | 44.2 | 43           | 0.4  | 0.832               |
| Rheumatic heart disease at index admission                       | 98          | 1.4  | 61.3 | 62          | 1.2  | 38.8 | 160          | 1.3  | 0.323               |
| Cardiomyopathies                                                 | 37          | 0.5  | 67.3 | 18          | 0.4  | 32.7 | 55           | 0.5  | 0.138               |
| Cardiomyopathies at index admission                              | 72          | 1.0  | 51.8 | 67          | 1.3  | 48.2 | 139          | 1.1  | 0.178               |
| Acute endocarditis and myocarditis                               | 5           | 0.1  | 83.3 | 1           | 0.0  | 16.7 | 6            | 0.1  | 0.199               |
| Other cardiac conditions                                         | 61          | 0.9  | 58.1 | 44          | 0.9  | 41.9 | 105          | 0.9  | 0.887               |
| Other cardiac conditions at index admission                      | 186         | 2.7  | 57.4 | 138         | 2.7  | 42.6 | 324          | 2.7  | 0.999               |
| Conduction disorders and arrhythmias                             | 312         | 4.5  | 54.4 | 262         | 5.0  | 45.6 | 574          | 4.7  | 0.129               |
| Cerebrovascular diseases                                         | 233         | 3.3  | 56.4 | 180         | 3.5  | 43.6 | 413          | 3.4  | 0.677               |
| Cerebrovascular diseases at index admission                      | 183         | 2.6  | 54.8 | 151         | 2.9  | 45.2 | 334          | 2.7  | 0.326               |
| Vascular diseases                                                | 169         | 2.4  | 56.3 | 131         | 2.5  | 43.7 | 300          | 2.5  | 0.702               |
| Vascular diseases at index admission                             | 213         | 3.0  | 57.3 | 159         | 3.1  | 42.7 | 372          | 3.1  | 0.951               |
| Chronic obstructive pulmonary disease (COPD)                     | 149         | 2.1  | 51.9 | 138         | 2.7  | 48.1 | 287          | 2.4  | 0.057               |
| Chronic nephropathy                                              | 252         | 3.6  | 58.3 | 180         | 3.5  | 41.7 | 432          | 3.5  | 0.693               |
| Chronic kidney disease                                           | 567         | 8.1  | 53.4 | 494         | 9.5  | 46.6 | 1061         | 8.7  | 0.006               |
| Chronic diseases (liver, pancreas, intestines)                   | 46          | 0.7  | 67.6 | 22          | 0.4  | 32.4 | 68           | 0.6  | 0.087               |
| Chronic diseases (liver, pancreas, intestine) at index admission | 46          | 0.7  | 65.7 | 24          | 0.5  | 34.3 | 70           | 0.6  | 0.159               |
| Previous coronary artery bypass grafting                         | 202         | 2.9  | 63.5 | 116         | 2.2  | 36.5 | 318          | 2.6  | 0.026               |
| Previous coronary angioplasty                                    | 757         | 10.8 | 61.4 | 476         | 9.2  | 38.6 | 1233         | 10.1 | 0.003               |
| Cerebrovascular revascularization                                | 39          | 0.6  | 51.3 | 37          | 0.7  | 48.7 | 76           | 0.6  | 0.281               |
| Other heart surgery                                              | 49          | 0.7  | 66.2 | 25          | 0.5  | 33.8 | 74           | 0.6  | 0.125               |
| Other vessel surgery                                             | 154         | 2.2  | 58.6 | 109         | 2.1  | 41.4 | 263          | 2.2  | 0.705               |
| <b>Type of hospital*</b>                                         |             |      |      |             |      |      |              |      | <.0001              |
| EADI                                                             | 4794        | 68.5 | 59.0 | 3335        | 64.2 | 41.0 | 8129         | 66.7 |                     |
| EADII                                                            | 2077        | 29.7 | 57.9 | 1512        | 29.1 | 42.1 | 3589         | 29.4 |                     |
| ER                                                               | 131         | 1.9  | 27.4 | 347         | 6.7  | 72.6 | 478          | 3.9  |                     |

\*EADI: Emergency Admission Department level I;

EADII: Emergency Admission Department level II;

ER: Emergency Room.

**Table S9.** Characteristics of patients included in the AMI cohort in 2021 (PRE) from participating facilities by 30-days mortality after first hospital admission in patients with AMI (Yes/No).

|                                                                  | 30-days mortality after first hospital admission in patients with AMI |      |       |             |      |       |             |      | $\chi^2$<br>p-value |
|------------------------------------------------------------------|-----------------------------------------------------------------------|------|-------|-------------|------|-------|-------------|------|---------------------|
|                                                                  | Yes                                                                   |      |       | No          |      |       | Total       |      |                     |
|                                                                  | N                                                                     | col% | row % | N           | col% | row % | N           | col% |                     |
| <b>Total</b>                                                     | <b>409</b>                                                            |      |       | <b>5577</b> |      |       | <b>5986</b> |      |                     |
| <b>A&amp;F intervention</b>                                      |                                                                       |      |       |             |      |       |             |      | 0.048               |
| Exposed                                                          | 251                                                                   | 61.4 | 7.4   | 3142        | 56.3 | 92.6  | 3393        | 56.7 |                     |
| Control                                                          | 158                                                                   | 38.6 | 6.1   | 2435        | 43.7 | 93.9  | 2593        | 43.3 |                     |
| <b>Sex</b>                                                       |                                                                       |      |       |             |      |       |             |      | <.0001              |
| Female                                                           | 169                                                                   | 41.3 | 9.5   | 1610        | 28.9 | 90.5  | 1779        | 29.7 |                     |
| Male                                                             | 240                                                                   | 58.7 | 5.7   | 3967        | 71.1 | 94.3  | 4207        | 70.3 |                     |
| <b>Age (years)</b>                                               |                                                                       |      |       |             |      |       |             |      | <.0001              |
| 19-59                                                            | 31                                                                    | 7.6  | 2.0   | 1507        | 27.0 | 98.0  | 1538        | 25.7 |                     |
| 60-69                                                            | 45                                                                    | 11.0 | 3.0   | 1461        | 26.2 | 97.0  | 1506        | 25.2 |                     |
| 70-79                                                            | 107                                                                   | 26.2 | 7.2   | 1379        | 24.7 | 92.8  | 1486        | 24.8 |                     |
| 80-100                                                           | 226                                                                   | 55.3 | 15.5  | 1230        | 22.1 | 84.5  | 1456        | 24.3 |                     |
| <b>Education level</b>                                           |                                                                       |      |       |             |      |       |             |      | <.0001              |
| Bachelor's degree                                                | 34                                                                    | 8.3  | 5.9   | 547         | 9.8  | 94.1  | 581         | 9.7  |                     |
| Lower middle high school                                         | 102                                                                   | 24.9 | 5.3   | 1838        | 33.0 | 94.7  | 1940        | 32.4 |                     |
| Middle high school                                               | 86                                                                    | 21.0 | 5.1   | 1611        | 28.9 | 94.9  | 1697        | 28.3 |                     |
| None or elementary                                               | 172                                                                   | 42.1 | 11.1  | 1375        | 24.7 | 88.9  | 1547        | 25.8 |                     |
| Not stated                                                       | 15                                                                    | 3.7  | 6.8   | 206         | 3.7  | 93.2  | 221         | 3.7  |                     |
| <b>Concomitant clinical conditions</b>                           |                                                                       |      |       |             |      |       |             |      |                     |
| Cancer                                                           | 42                                                                    | 10.3 | 13.0  | 282         | 5.1  | 87.0  | 324         | 5.4  | <.0001              |
| Diabetes                                                         | 42                                                                    | 10.3 | 12.5  | 295         | 5.3  | 87.5  | 337         | 5.6  | <.0001              |
| Lipid metabolism disorders                                       | 12                                                                    | 2.9  | 7.3   | 152         | 2.7  | 92.7  | 164         | 2.7  | 0.803               |
| Obesity                                                          | 3                                                                     | 0.7  | 10.3  | 26          | 0.5  | 89.7  | 29          | 0.5  | 0.452               |
| Obesity at index admission                                       | 7                                                                     | 1.7  | 2.6   | 262         | 4.7  | 97.4  | 269         | 4.5  | 0.005               |
| Anaemias                                                         | 34                                                                    | 8.3  | 21.5  | 124         | 2.2  | 78.5  | 158         | 2.6  | <.0001              |
| Anaemias at index admission                                      | 27                                                                    | 6.6  | 10.5  | 229         | 4.1  | 89.5  | 256         | 4.3  | 0.016               |
| Coagulation defects                                              | —                                                                     | —    | —     | 3           | 0.1  | 100.0 | 3           | 0.1  | 0.639               |
| Coagulation defects at index admission                           | —                                                                     | —    | —     | 1           | 0.0  | 100.0 | 1           | 0.0  | 0.787               |
| Other haematological diseases                                    | 1                                                                     | 0.2  | 5.0   | 19          | 0.3  | 95.0  | 20          | 0.3  | 0.745               |
| Other haematological diseases at index admission                 | 2                                                                     | 0.5  | 7.7   | 24          | 0.4  | 92.3  | 26          | 0.4  | 0.862               |
| Arterial hypertension                                            | 52                                                                    | 12.7 | 8.5   | 558         | 10.0 | 91.5  | 610         | 10.2 | 0.081               |
| Previous myocardial infarction                                   | 29                                                                    | 7.1  | 5.9   | 462         | 8.3  | 94.1  | 491         | 8.2  | 0.396               |
| Other forms of ischemic heart disease                            | 51                                                                    | 12.5 | 10.1  | 452         | 8.1  | 89.9  | 503         | 8.4  | 0.002               |
| Heart failure                                                    | 48                                                                    | 11.7 | 17.9  | 220         | 3.9  | 82.1  | 268         | 4.5  | <.0001              |
| Not well-defined forms and complications of heart disease        | 4                                                                     | 1.0  | 8.7   | 42          | 0.8  | 91.3  | 46          | 0.8  | 0.615               |
| Rheumatic heart disease                                          | 3                                                                     | 0.7  | 11.1  | 24          | 0.4  | 88.9  | 27          | 0.5  | 0.377               |
| Rheumatic heart disease at index admission                       | 18                                                                    | 4.4  | 20.5  | 70          | 1.3  | 79.5  | 88          | 1.5  | <.0001              |
| Cardiomyopathies                                                 | 6                                                                     | 1.5  | 20.0  | 24          | 0.4  | 80.0  | 30          | 0.5  | 0.004               |
| Cardiomyopathies at index admission                              | 7                                                                     | 1.7  | 10.1  | 62          | 1.1  | 89.9  | 69          | 1.2  | 0.273               |
| Acute endocarditis and myocarditis                               | —                                                                     | —    | —     | 5           | 0.1  | 100.0 | 5           | 0.1  | 0.545               |
| Other cardiac conditions                                         | 7                                                                     | 1.7  | 15.2  | 39          | 0.7  | 84.8  | 46          | 0.8  | 0.024               |
| Other cardiac conditions at index admission                      | 22                                                                    | 5.4  | 11.9  | 163         | 2.9  | 88.1  | 185         | 3.1  | 0.006               |
| Conduction disorders and arrhythmias                             | 39                                                                    | 9.5  | 13.1  | 258         | 4.6  | 86.9  | 297         | 5.0  | <.0001              |
| Cerebrovascular diseases                                         | 23                                                                    | 5.6  | 11.9  | 171         | 3.1  | 88.1  | 194         | 3.2  | 0.005               |
| Cerebrovascular diseases at index admission                      | 18                                                                    | 4.4  | 11.3  | 141         | 2.5  | 88.7  | 159         | 2.7  | 0.023               |
| Vascular diseases                                                | 21                                                                    | 5.1  | 14.6  | 123         | 2.2  | 85.4  | 144         | 2.4  | 0.000               |
| Vascular diseases at index admission                             | 12                                                                    | 2.9  | 7.0   | 159         | 2.9  | 93.0  | 171         | 2.9  | 0.923               |
| Chronic obstructive pulmonary disease (COPD)                     | 18                                                                    | 4.4  | 12.0  | 132         | 2.4  | 88.0  | 150         | 2.5  | 0.011               |
| Chronic nephropathy                                              | 32                                                                    | 7.8  | 15.2  | 178         | 3.2  | 84.8  | 210         | 3.5  | <.0001              |
| Chronic kidney disease                                           | 59                                                                    | 14.4 | 11.7  | 447         | 8.0  | 88.3  | 506         | 8.5  | <.0001              |
| Chronic diseases (liver, pancreas, intestines)                   | 6                                                                     | 1.5  | 15.4  | 33          | 0.6  | 84.6  | 39          | 0.7  | 0.034               |
| Chronic diseases (liver, pancreas, intestine) at index admission | 3                                                                     | 0.7  | 8.8   | 31          | 0.6  | 91.2  | 34          | 0.6  | 0.645               |
| Previous coronary artery bypass grafting                         | 19                                                                    | 4.7  | 11.8  | 142         | 2.6  | 88.2  | 161         | 2.7  | 0.011               |
| Previous coronary angioplasty                                    | 31                                                                    | 7.6  | 4.9   | 607         | 10.9 | 95.1  | 638         | 10.7 | 0.037               |
| Cerebrovascular revascularization                                | 4                                                                     | 1.0  | 13.8  | 25          | 0.5  | 86.2  | 29          | 0.5  | 0.136               |
| Other heart surgery                                              | 7                                                                     | 1.7  | 21.2  | 26          | 0.5  | 78.8  | 33          | 0.6  | 0.001               |
| Other vessel surgery                                             | 19                                                                    | 4.7  | 14.7  | 110         | 2.0  | 85.3  | 129         | 2.2  | 0.000               |
| <b>Type of hospital*</b>                                         |                                                                       |      |       |             |      |       |             |      | 0.028               |
| EADI                                                             | 267                                                                   | 65.3 | 6.9   | 3629        | 65.1 | 93.1  | 3896        | 65.1 |                     |
| EADII                                                            | 134                                                                   | 32.8 | 7.4   | 1686        | 30.2 | 92.6  | 1820        | 30.4 |                     |
| ER                                                               | 8                                                                     | 2.0  | 3.0   | 262         | 4.7  | 97.0  | 270         | 4.5  |                     |

\*EADI: Emergency Admission Department level I;  
EADII: Emergency Admission Department level II;  
ER: Emergency Room.

**Table S10.** Characteristics of patients included in the AMI cohort in 2022 (POST) from participating facilities by 30-days mortality after first hospital admission in patients with AMI (Yes/No).

| 30-days mortality after first hospital admission in patients with AMI | $\chi^2$<br>p-value |
|-----------------------------------------------------------------------|---------------------|
|-----------------------------------------------------------------------|---------------------|

|                                                                  | Yes        |      |       | No          |      |       | Total       |      |        |
|------------------------------------------------------------------|------------|------|-------|-------------|------|-------|-------------|------|--------|
|                                                                  | N          | col% | row % | N           | col% | row % | N           | col% |        |
| <b>Total</b>                                                     | <b>430</b> |      |       | <b>5780</b> |      |       | <b>6210</b> |      |        |
| <b>A&amp;F intervention</b>                                      |            |      |       |             |      |       |             |      | 0.103  |
| Exposed                                                          | 266        | 61.9 | 7.4   | 3343        | 57.8 | 92.6  | 3609        | 58.1 |        |
| Control                                                          | 164        | 38.1 | 6.3   | 2437        | 42.2 | 93.7  | 2601        | 41.9 |        |
| <b>Sex</b>                                                       |            |      |       |             |      |       |             |      | 0.0    |
| Female                                                           | 185        | 43.0 | 10.1  | 1641        | 28.4 | 89.9  | 1826        | 29.4 | <.0001 |
| Male                                                             | 245        | 57.0 | 5.6   | 4139        | 71.6 | 94.4  | 4384        | 70.6 |        |
| <b>Age (years)</b>                                               |            |      |       |             |      |       |             |      | 0.0    |
| 19-59                                                            | 29         | 6.7  | 1.9   | 1526        | 26.4 | 98.1  | 1555        | 25.0 | <.0001 |
| 60-69                                                            | 47         | 10.9 | 3.0   | 1515        | 26.2 | 97.0  | 1562        | 25.2 |        |
| 70-79                                                            | 113        | 26.3 | 7.4   | 1416        | 24.5 | 92.6  | 1529        | 24.6 |        |
| 80-100                                                           | 241        | 56.1 | 15.4  | 1323        | 22.9 | 84.6  | 1564        | 25.2 |        |
| <b>Education level</b>                                           |            |      |       |             |      |       |             |      | 0.0    |
| Bachelor's degree                                                | 35         | 8.1  | 5.3   | 628         | 10.9 | 94.7  | 663         | 10.7 | <.0001 |
| Lower middle high school                                         | 113        | 26.3 | 5.6   | 1893        | 32.8 | 94.4  | 2006        | 32.3 |        |
| Middle high school                                               | 90         | 20.9 | 5.1   | 1681        | 29.1 | 94.9  | 1771        | 28.5 |        |
| None or elementary                                               | 168        | 39.1 | 11.3  | 1317        | 22.8 | 88.7  | 1485        | 23.9 |        |
| Not stated                                                       | 24         | 5.6  | 8.4   | 261         | 4.5  | 91.6  | 285         | 4.6  |        |
| <b>Concomitant clinical conditions</b>                           |            |      |       |             |      |       |             |      | 0.0    |
| Cancer                                                           | 55         | 12.8 | 15.7  | 295         | 5.1  | 84.3  | 350         | 5.6  | <.0001 |
| Diabetes                                                         | 47         | 10.9 | 12.2  | 338         | 5.9  | 87.8  | 385         | 6.2  | <.0001 |
| Lipid metabolism disorders                                       | 13         | 3.0  | 6.8   | 177         | 3.1  | 93.2  | 190         | 3.1  | 0.964  |
| Obesity                                                          | 2          | 0.5  | 5.4   | 35          | 0.6  | 94.6  | 37          | 0.6  | 0.715  |
| Obesity at index admission                                       | 6          | 1.4  | 2.2   | 263         | 4.6  | 97.8  | 269         | 4.3  | 0.002  |
| Anaemias                                                         | 28         | 6.5  | 16.7  | 140         | 2.4  | 83.3  | 168         | 2.7  | <.0001 |
| Anaemias at index admission                                      | 27         | 6.3  | 8.9   | 275         | 4.8  | 91.1  | 302         | 4.9  | 0.157  |
| Coagulation defects                                              | 1          | 0.2  | 33.3  | 2           | 0.0  | 66.7  | 3           | 0.0  | 0.072  |
| Coagulation defects at index admission                           |            |      |       | 2           | 0.0  | 100.0 | 2           | 0.0  | 0.700  |
| Other haematological diseases                                    | 1          | 0.2  | 9.1   | 10          | 0.2  | 90.9  | 11          | 0.2  | 0.777  |
| Other haematological diseases at index admission                 | 2          | 0.5  | 10.0  | 18          | 0.3  | 90.0  | 20          | 0.3  | 0.587  |
| Arterial hypertension                                            | 60         | 14.0 | 9.6   | 567         | 9.8  | 90.4  | 627         | 10.1 | 0.006  |
| Previous myocardial infarction                                   | 25         | 5.8  | 5.5   | 433         | 7.5  | 94.5  | 458         | 7.4  | 0.199  |
| Other forms of ischemic heart disease                            | 39         | 9.1  | 7.9   | 453         | 7.8  | 92.1  | 492         | 7.9  | 0.361  |
| Heart failure                                                    | 42         | 9.8  | 15.3  | 232         | 4.0  | 84.7  | 274         | 4.4  | <.0001 |
| Not well-defined forms and complications of heart disease        | 2          | 0.5  | 6.9   | 27          | 0.5  | 93.1  | 29          | 0.5  | 0.995  |
| Rheumatic heart disease                                          | 3          | 0.7  | 18.8  | 13          | 0.2  | 81.3  | 16          | 0.3  | 0.062  |
| Rheumatic heart disease at index admission                       | 9          | 2.1  | 12.5  | 63          | 1.1  | 87.5  | 72          | 1.2  | 0.061  |
| Cardiomyopathies                                                 | 2          | 0.5  | 8.0   | 23          | 0.4  | 92.0  | 25          | 0.4  | 0.832  |
| Cardiomyopathies at index admission                              | 1          | 0.2  | 1.4   | 69          | 1.2  | 98.6  | 70          | 1.1  | 0.069  |
| Acute endocarditis and myocarditis                               |            |      |       | 1           | 0.0  | 100.0 | 1           | 0.0  | 0.785  |
| Other cardiac conditions                                         | 7          | 1.6  | 11.9  | 52          | 0.9  | 88.1  | 59          | 1.0  | 0.133  |
| Other cardiac conditions at index admission                      | 13         | 3.0  | 9.4   | 126         | 2.2  | 90.6  | 139         | 2.2  | 0.254  |
| Conduction disorders and arrhythmias                             | 36         | 8.4  | 13.0  | 241         | 4.2  | 87.0  | 277         | 4.5  | <.0001 |
| Cerebrovascular diseases                                         | 24         | 5.6  | 11.0  | 195         | 3.4  | 89.0  | 219         | 3.5  | 0.017  |
| Cerebrovascular diseases at index admission                      | 16         | 3.7  | 9.1   | 159         | 2.8  | 90.9  | 175         | 2.8  | 0.241  |
| Vascular diseases                                                | 19         | 4.4  | 12.2  | 137         | 2.4  | 87.8  | 156         | 2.5  | 0.009  |
| Vascular diseases at index admission                             | 12         | 2.8  | 6.0   | 189         | 3.3  | 94.0  | 201         | 3.2  | 0.588  |
| Chronic obstructive pulmonary disease (COPD)                     | 20         | 4.7  | 14.6  | 117         | 2.0  | 85.4  | 137         | 2.2  | 0.000  |
| Chronic nephropathy                                              | 36         | 8.4  | 16.2  | 186         | 3.2  | 83.8  | 222         | 3.6  | <.0001 |
| Chronic kidney disease                                           | 57         | 13.3 | 10.3  | 498         | 8.6  | 89.7  | 555         | 8.9  | 0.001  |
| Chronic diseases (liver, pancreas, intestines)                   | 3          | 0.7  | 10.3  | 26          | 0.5  | 89.7  | 29          | 0.5  | 0.467  |
| Chronic diseases (liver, pancreas, intestine) at index admission | 4          | 0.9  | 11.1  | 32          | 0.6  | 88.9  | 36          | 0.6  | 0.321  |
| Previous coronary artery bypass grafting                         | 12         | 2.8  | 7.6   | 145         | 2.5  | 92.4  | 157         | 2.5  | 0.719  |
| Previous coronary angioplasty                                    | 34         | 7.9  | 5.7   | 561         | 9.7  | 94.3  | 595         | 9.6  | 0.221  |
| Cerebrovascular revascularization                                | 2          | 0.5  | 4.3   | 45          | 0.8  | 95.7  | 47          | 0.8  | 0.469  |
| Other heart surgery                                              | 6          | 1.4  | 14.6  | 35          | 0.6  | 85.4  | 41          | 0.7  | 0.051  |
| Other vessel surgery                                             | 11         | 2.6  | 8.2   | 123         | 2.1  | 91.8  | 134         | 2.2  | 0.554  |
| <b>Type of hospital*</b>                                         |            |      |       |             |      |       |             |      | 0.0    |
| EADI                                                             | 287        | 66.7 | 6.8   | 3946        | 68.3 | 93.2  | 4233        | 68.2 | 0.807  |
| EADII                                                            | 128        | 29.8 | 7.2   | 1641        | 28.4 | 92.8  | 1769        | 28.5 |        |
| ER                                                               | 15         | 3.5  | 7.2   | 193         | 3.3  | 92.8  | 208         | 3.3  |        |

\*EADI: Emergency Admission Department level I;

EADII: Emergency Admission Department level II;

ER: Emergency Room.

*STEMI patient cohort*

**Table S11.** Characteristics of patients included in the STEMI cohort in 2021 and 2022 from participating facilities according to A&F intervention exposure status.

|                                                                  | Exposed     |      |       | Control     |      |       | Total       |      | $\chi^2$<br>p-value |
|------------------------------------------------------------------|-------------|------|-------|-------------|------|-------|-------------|------|---------------------|
|                                                                  | N           | col% | row%  | N           | col% | row%  | N           | col% |                     |
| <b>Total</b>                                                     | <b>3272</b> |      |       | <b>1812</b> |      |       | <b>5084</b> |      |                     |
| <b>Sex</b>                                                       |             |      |       |             |      |       |             |      | 0.408               |
| Female                                                           | 816         | 24.9 | 63.4  | 471         | 26.0 | 36.6  | 1287        | 25.3 |                     |
| Male                                                             | 2456        | 75.1 | 64.7  | 1341        | 74.0 | 35.3  | 3797        | 74.7 |                     |
| <b>Age (years)</b>                                               |             |      |       |             |      |       |             |      | 0.688               |
| 21-57                                                            | 825         | 25.2 | 63.1  | 482         | 26.6 | 36.9  | 1307        | 25.7 |                     |
| 58-65                                                            | 782         | 23.9 | 64.4  | 433         | 23.9 | 35.6  | 1215        | 23.9 |                     |
| 66-75                                                            | 840         | 25.7 | 64.6  | 460         | 25.4 | 35.4  | 1300        | 25.6 |                     |
| 76-100                                                           | 825         | 25.2 | 65.4  | 437         | 24.1 | 34.6  | 1262        | 24.8 |                     |
| <b>Education level</b>                                           |             |      |       |             |      |       |             |      | 0.355               |
| Degree                                                           | 368         | 11.3 | 63.8  | 209         | 11.5 | 36.2  | 577         | 11.4 |                     |
| Lower middle high school                                         | 1073        | 32.8 | 64.8  | 584         | 32.2 | 35.2  | 1657        | 32.6 |                     |
| Middle high school                                               | 1022        | 31.2 | 65.1  | 547         | 30.2 | 34.9  | 1569        | 30.9 |                     |
| None or elementary                                               | 653         | 20.0 | 64.3  | 362         | 20.0 | 35.7  | 1015        | 20.0 |                     |
| Not stated                                                       | 156         | 4.8  | 58.6  | 110         | 6.1  | 41.4  | 266         | 5.2  |                     |
| <b>Concomitant clinical conditions</b>                           |             |      |       |             |      |       |             |      |                     |
| Cancer                                                           | 154         | 4.7  | 63.4  | 89          | 4.9  | 36.6  | 243         | 4.8  | 0.743               |
| Diabetes                                                         | 99          | 3.0  | 61.5  | 62          | 3.4  | 38.5  | 161         | 3.2  | 0.440               |
| Lipid metabolism disorders                                       | 48          | 1.5  | 60.0  | 32          | 1.8  | 40.0  | 80          | 1.6  | 0.412               |
| Obesity                                                          | 12          | 0.4  | 75.0  | 4           | 0.2  | 25.0  | 16          | 0.3  | 0.373               |
| Obesity at index admission                                       | 161         | 4.9  | 72.5  | 61          | 3.4  | 27.5  | 222         | 4.4  | 0.009               |
| Anaemias                                                         | 33          | 1.0  | 55.0  | 27          | 1.5  | 45.0  | 60          | 1.2  | 0.128               |
| Anaemias at index admission                                      | 97          | 3.0  | 61.0  | 62          | 3.4  | 39.0  | 159         | 3.1  | 0.370               |
| Coagulation defects                                              | —           | —    | —     | 1           | 0.1  | 100.0 | 1           | 0.0  | 0.179               |
| Coagulation defects at index admission                           | 1           | 0.0  | 100.0 | —           | —    | —     | 1           | 0.0  | 0.457               |
| Other hematological diseases                                     | 10          | 0.3  | 66.7  | 5           | 0.3  | 33.3  | 15          | 0.3  | 0.852               |
| Other hematological diseases at index admission                  | 13          | 0.4  | 76.5  | 4           | 0.2  | 23.5  | 17          | 0.3  | 0.296               |
| Arterial hypertension                                            | 199         | 6.1  | 61.2  | 126         | 7.0  | 38.8  | 325         | 6.4  | 0.224               |
| Previous myocardial infarction                                   | 152         | 4.7  | 72.0  | 59          | 3.3  | 28.0  | 211         | 4.2  | 0.017               |
| Other forms of ischemic heart disease                            | 149         | 4.6  | 68.7  | 68          | 3.8  | 31.3  | 217         | 4.3  | 0.176               |
| Heart failure                                                    | 59          | 1.8  | 71.1  | 24          | 1.3  | 28.9  | 83          | 1.6  | 0.197               |
| Not well-defined forms and complications of heart disease        | 8           | 0.2  | 61.5  | 5           | 0.3  | 38.5  | 13          | 0.3  | 0.832               |
| Rheumatic heart disease                                          | 5           | 0.2  | 62.5  | 3           | 0.2  | 37.5  | 8           | 0.2  | 0.913               |
| Rheumatic heart disease at index admission                       | 32          | 1.0  | 74.4  | 11          | 0.6  | 25.6  | 43          | 0.9  | 0.167               |
| Cardiomyopathies                                                 | 10          | 0.3  | 62.5  | 6           | 0.3  | 37.5  | 16          | 0.3  | 0.876               |
| Cardiomyopathie at index admission                               | 25          | 0.8  | 43.1  | 33          | 1.8  | 56.9  | 58          | 1.1  | 0.001               |
| Acute endocarditis and myocarditis                               | 1           | 0.0  | 100.0 | —           | —    | —     | 1           | 0.0  | 0.457               |
| Other cardiac conditions                                         | 8           | 0.2  | 61.5  | 5           | 0.3  | 38.5  | 13          | 0.3  | 0.832               |
| Other cardiac conditions at index admission                      | 49          | 1.5  | 74.2  | 17          | 0.9  | 25.8  | 66          | 1.3  | 0.092               |
| Conduction disorders and arrhythmias                             | 72          | 2.2  | 59.0  | 50          | 2.8  | 41.0  | 122         | 2.4  | 0.212               |
| Cerebrovascular diseases                                         | 77          | 2.4  | 64.2  | 43          | 2.4  | 35.8  | 120         | 2.4  | 0.965               |
| Cerebrovascular diseases at index admission                      | 76          | 2.3  | 62.3  | 46          | 2.5  | 37.7  | 122         | 2.4  | 0.630               |
| Vascular diseases                                                | 54          | 1.7  | 67.5  | 26          | 1.4  | 32.5  | 80          | 1.6  | 0.554               |
| Vascular diseases at index admission                             | 69          | 2.1  | 65.1  | 37          | 2.0  | 34.9  | 106         | 2.1  | 0.873               |
| Chronic obstructive pulmonary disease (COPD)                     | 43          | 1.3  | 71.7  | 17          | 0.9  | 28.3  | 60          | 1.2  | 0.235               |
| Chronic nephropathy                                              | 69          | 2.1  | 71.1  | 28          | 1.5  | 28.9  | 97          | 1.9  | 0.160               |
| Chronic kidney disease                                           | 188         | 5.8  | 63.5  | 108         | 6.0  | 36.5  | 296         | 5.8  | 0.754               |
| Chronic diseases (liver, pancreas, intestines)                   | 14          | 0.4  | 73.7  | 5           | 0.3  | 26.3  | 19          | 0.4  | 0.395               |
| Chronic diseases (liver, pancreas, intestine) at index admission | 22          | 0.7  | 81.5  | 5           | 0.3  | 18.5  | 27          | 0.5  | 0.063               |
| Previous coronary artery bypass grafting                         | 34          | 1.0  | 73.9  | 12          | 0.7  | 26.1  | 46          | 0.9  | 0.174               |
| Previous coronary angioplasty                                    | 235         | 7.2  | 74.8  | 79          | 4.4  | 25.2  | 314         | 6.2  | <.0001              |
| Cerebrovascular revascularization                                | 10          | 0.3  | 62.5  | 6           | 0.3  | 37.5  | 16          | 0.3  | 0.876               |
| Other heart surgery                                              | 13          | 0.4  | 61.9  | 8           | 0.4  | 38.1  | 21          | 0.4  | 0.814               |
| Other vessel surgery                                             | 45          | 1.4  | 68.2  | 21          | 1.2  | 31.8  | 66          | 1.3  | 0.514               |
| <b>Type of hospital*</b>                                         |             |      |       |             |      |       |             |      | <.0001              |
| DEAI                                                             | 2169        | 66.3 | 69.7  | 944         | 52.1 | 30.3  | 3113        | 61.2 |                     |
| DEAII                                                            | 1103        | 33.7 | 56.0  | 868         | 47.9 | 44.0  | 1971        | 38.8 |                     |

\*EADI: Emergency Admission Department level I;

EADII: Emergency Admission Department level II;

**Table S12.** Characteristics of patients included in the STEMI cohort in 2021 (PRE) from participating facilities according to performing of PTCA within 90 minutes of admission to the hospital ER (Yes/No).

|                                                                  | % PTCA STEMI patients within 90 min<br>of admission to the ED |      |       |            |       |       | Total       |       | $\chi^2$<br>p-value |
|------------------------------------------------------------------|---------------------------------------------------------------|------|-------|------------|-------|-------|-------------|-------|---------------------|
|                                                                  | Yes                                                           |      |       | No         |       |       |             |       |                     |
|                                                                  | N                                                             | col% | row % | N          | col % | row % | N           | col % |                     |
| <b>Total</b>                                                     | <b>1420</b>                                                   |      |       | <b>101</b> |       |       | <b>2433</b> |       |                     |
| <b>A&amp;F intervention</b>                                      |                                                               |      |       | <b>3</b>   |       |       |             |       |                     |
| Exposed                                                          | 904                                                           | 63.7 | 58.7  | 637        | 62.9  | 41.3  | 1541        | 63.3  | 0.694               |
| Control                                                          | 516                                                           | 36.3 | 57.8  | 376        | 37.1  | 42.2  | 892         | 36.7  |                     |
| <b>Sex</b>                                                       |                                                               |      |       |            |       |       |             |       |                     |
| Female                                                           | 324                                                           | 22.8 | 51.8  | 301        | 29.7  | 48.2  | 625         | 25.7  | 0.000               |
| Male                                                             | 1096                                                          | 77.2 | 60.6  | 712        | 70.3  | 39.4  | 1808        | 74.3  |                     |
| <b>Age (years)</b>                                               |                                                               |      |       |            |       |       |             |       |                     |
| 21-57                                                            | 408                                                           | 28.7 | 65.6  | 214        | 21.1  | 34.4  | 622         | 25.6  | <.0001              |
| 58-65                                                            | 373                                                           | 26.3 | 63.5  | 214        | 21.1  | 36.5  | 587         | 24.1  |                     |
| <b>66-75</b>                                                     | 352                                                           | 24.8 | 56.2  | 274        | 27.1  | 43.8  | 626         | 25.7  |                     |
| 76-100                                                           | 287                                                           | 20.2 | 48.0  | 311        | 30.7  | 52.0  | 598         | 24.6  |                     |
| <b>Education level</b>                                           |                                                               |      |       |            |       |       |             |       |                     |
| Bachelor's degree                                                | 147                                                           | 10.4 | 57.0  | 111        | 11.0  | 43.0  | 258         | 10.6  | 0.013               |
| Lower middle high school                                         | 481                                                           | 33.9 | 59.4  | 329        | 32.5  | 40.6  | 810         | 33.3  |                     |
| <b>Middle high school</b>                                        | 455                                                           | 32.0 | 62.2  | 277        | 27.3  | 37.8  | 732         | 30.1  |                     |
| None or elementary                                               | 268                                                           | 18.9 | 52.3  | 244        | 24.1  | 47.7  | 512         | 21.0  |                     |
| Not stated                                                       | 69                                                            | 4.9  | 57.0  | 52         | 5.1   | 43.0  | 121         | 5.0   |                     |
| <b>Concomitant clinical conditions</b>                           |                                                               |      |       |            |       |       |             |       |                     |
| Cancer                                                           | 47                                                            | 3.3  | 39.5  | 72         | 7.1   | 60.5  | 119         | 4.9   | <.0001              |
| Diabetes                                                         | 28                                                            | 2.0  | 38.9  | 44         | 4.3   | 61.1  | 72          | 3.0   | 0.001               |
| Lipid metabolism disorders                                       | 16                                                            | 1.1  | 48.5  | 17         | 1.7   | 51.5  | 33          | 1.4   | 0.246               |
| Obesity                                                          | 1                                                             | 0.1  | 16.7  | 5          | 0.5   | 83.3  | 6           | 0.2   | 0.038               |
| Obesity at index admission                                       | 61                                                            | 4.3  | 50.4  | 60         | 5.9   | 49.6  | 121         | 5.0   | 0.069               |
| Anaemias                                                         | 8                                                             | 0.6  | 26.7  | 22         | 2.2   | 73.3  | 30          | 1.2   | 0.000               |
| Anaemias at index admission                                      | 24                                                            | 1.7  | 30.4  | 55         | 5.4   | 69.6  | 79          | 3.2   | <.0001              |
| Coagulation defects                                              | —                                                             | —    | —     | —          | —     | —     | —           | —     | —                   |
| Coagulation defects at index admission                           | —                                                             | —    | —     | —          | —     | —     | —           | —     | —                   |
| Other haematological diseases                                    | 3                                                             | 0.2  | 30.0  | 7          | 0.7   | 70.0  | 10          | 0.4   | 0.068               |
| Other haematological diseases at index admission                 | 3                                                             | 0.2  | 42.9  | 4          | 0.4   | 57.1  | 7           | 0.3   | 0.405               |
| Arterial hypertension                                            | 74                                                            | 5.2  | 50.3  | 73         | 7.2   | 49.7  | 147         | 6.0   | 0.042               |
| Previous myocardial infarction                                   | 39                                                            | 2.8  | 38.6  | 62         | 6.1   | 61.4  | 101         | 4.2   | <.0001              |
| Other forms of ischemic heart disease                            | 36                                                            | 2.5  | 36.4  | 63         | 6.2   | 63.6  | 99          | 4.1   | <.0001              |
| Heart failure                                                    | 12                                                            | 0.9  | 32.4  | 25         | 2.5   | 67.6  | 37          | 1.5   | 0.001               |
| Not well-defined forms and complications of heart disease        | 2                                                             | 0.1  | 28.6  | 5          | 0.5   | 71.4  | 7           | 0.3   | 0.109               |
| Rheumatic heart disease                                          | 2                                                             | 0.1  | 40.0  | 3          | 0.3   | 60.0  | 5           | 0.2   | 0.404               |
| Rheumatic heart disease at index admission                       | 6                                                             | 0.4  | 30.0  | 14         | 1.4   | 70.0  | 20          | 0.8   | 0.010               |
| Cardiomyopathies                                                 | 1                                                             | 0.1  | 25.0  | 3          | 0.3   | 75.0  | 4           | 0.2   | 0.176               |
| Cardiomyopathies at index admission                              | 10                                                            | 0.7  | 34.5  | 19         | 1.9   | 65.5  | 29          | 1.2   | 0.009               |
| Acute endocarditis and myocarditis                               | —                                                             | —    | —     | —          | —     | —     | —           | —     | —                   |
| Other cardiac conditions                                         | 1                                                             | 0.1  | 16.7  | 5          | 0.5   | 83.3  | 6           | 0.2   | 0.038               |
| Other cardiac conditions at index admission                      | 9                                                             | 0.6  | 30.0  | 21         | 2.1   | 70.0  | 30          | 1.2   | 0.002               |
| Conduction disorders and arrhythmias                             | 20                                                            | 1.4  | 33.3  | 40         | 4.0   | 66.7  | 60          | 2.5   | <.0001              |
| Cerebrovascular diseases                                         | 20                                                            | 1.4  | 36.4  | 35         | 3.5   | 63.6  | 55          | 2.3   | 0.001               |
| Cerebrovascular diseases at index admission                      | 14                                                            | 1.0  | 26.9  | 38         | 3.8   | 73.1  | 52          | 2.1   | <.0001              |
| Vascular diseases                                                | 15                                                            | 1.1  | 39.5  | 23         | 2.3   | 60.5  | 38          | 1.6   | 0.017               |
| Vascular diseases at index admission                             | 19                                                            | 1.3  | 33.9  | 37         | 3.7   | 66.1  | 56          | 2.3   | 0.000               |
| Chronic obstructive pulmonary disease (COPD)                     | 11                                                            | 0.8  | 39.3  | 17         | 1.7   | 60.7  | 28          | 1.2   | 0.039               |
| Chronic nephropathy                                              | 18                                                            | 1.3  | 41.9  | 25         | 2.5   | 58.1  | 43          | 1.8   | 0.027               |
| Chronic kidney disease                                           | 63                                                            | 4.4  | 45.7  | 75         | 7.4   | 54.3  | 138         | 5.7   | 0.002               |
| Chronic diseases (liver, pancreas, intestines)                   | 5                                                             | 0.4  | 50.0  | 5          | 0.5   | 50.0  | 10          | 0.4   | 0.591               |
| Chronic diseases (liver, pancreas, intestine) at index admission | 4                                                             | 0.3  | 50.0  | 4          | 0.4   | 50.0  | 8           | 0.3   | 0.631               |
| Previous coronary artery bypass grafting                         | 7                                                             | 0.5  | 35.0  | 13         | 1.3   | 65.0  | 20          | 0.8   | 0.033               |
| Previous coronary angioplasty                                    | 78                                                            | 5.5  | 51.7  | 73         | 7.2   | 48.3  | 151         | 6.2   | 0.084               |
| Cerebrovascular revascularization                                | 4                                                             | 0.3  | 66.7  | 2          | 0.2   | 33.3  | 6           | 0.2   | 0.680               |
| Other heart surgery                                              | 2                                                             | 0.1  | 25.0  | 6          | 0.6   | 75.0  | 8           | 0.3   | 0.055               |
| Other vessel surgery                                             | 13                                                            | 0.9  | 41.9  | 18         | 1.8   | 58.1  | 31          | 1.3   | 0.062               |
| <b>Type of hospital*</b>                                         |                                                               |      |       |            |       |       |             | 0.0   | 0.024               |
| EADI                                                             | 901                                                           | 63.5 | 60.1  | 597        | 58.9  | 39.9  | 1498        | 61.6  |                     |
| EADII                                                            | 519                                                           | 36.6 | 55.5  | 416        | 41.1  | 44.5  | 935         | 38.4  |                     |

\*EADI: Emergency Admission Department level I;

EADII: Emergency Admission Department level II;



**Table S13.** Characteristics of patients included in the STEMI cohort in 2022 (POST) from participating facilities according to performing of PTCA within 90 minutes of admission to the hospital ER (Yes/No).

|                                                                  | % PTCA STEMI patients within 90 min<br>of admission to the hospital ER |      |       |            |       |       |             | χ <sup>2</sup><br>p-value |        |
|------------------------------------------------------------------|------------------------------------------------------------------------|------|-------|------------|-------|-------|-------------|---------------------------|--------|
|                                                                  | Yes                                                                    |      |       | No         |       |       | Total       |                           |        |
|                                                                  | N                                                                      | col% | row % | N          | col % | row % | N           |                           | col%   |
| <b>Total</b>                                                     | <b>1657</b>                                                            |      |       | <b>994</b> |       |       | <b>2651</b> |                           |        |
| <b>A&amp;F intervention</b>                                      |                                                                        |      |       |            |       |       |             |                           |        |
| Exposed                                                          | 1046                                                                   | 63.1 | 60.4  | 685        | 68.9  | 39.6  | 1731        | 65.3                      | 0.002  |
| Control                                                          | 611                                                                    | 36.9 | 66.4  | 309        | 31.1  | 33.6  | 920         | 34.7                      |        |
| <b>Sex</b>                                                       |                                                                        |      |       |            |       |       |             |                           |        |
| Female                                                           | 377                                                                    | 22.8 | 56.9  | 285        | 28.7  | 43.1  | 662         | 25.0                      | 0.00   |
| Male                                                             | 1280                                                                   | 77.3 | 64.4  | 709        | 71.3  | 35.6  | 1989        | 75.0                      |        |
| <b>Age (years)</b>                                               |                                                                        |      |       |            |       |       |             |                           |        |
| 21-57                                                            | 471                                                                    | 28.4 | 68.8  | 214        | 21.5  | 31.2  | 685         | 25.8                      | <.0001 |
| 58-65                                                            | 435                                                                    | 26.3 | 69.3  | 193        | 19.4  | 30.7  | 628         | 23.7                      |        |
| <b>66-75</b>                                                     | 429                                                                    | 25.9 | 63.6  | 245        | 24.7  | 36.4  | 674         | 25.4                      |        |
| 76-100                                                           | 322                                                                    | 19.4 | 48.5  | 342        | 34.4  | 51.5  | 664         | 25.0                      |        |
| Education level                                                  |                                                                        |      |       |            |       |       |             |                           |        |
| Bachelor's degree                                                | 192                                                                    | 11.6 | 60.2  | 127        | 12.8  | 39.8  | 319         | 12.0                      | 0.002  |
| Lower middle high school                                         | 550                                                                    | 33.2 | 64.9  | 297        | 29.9  | 35.1  | 847         | 32.0                      |        |
| <b>Middle high school</b>                                        | 533                                                                    | 32.2 | 63.7  | 304        | 30.6  | 36.3  | 837         | 31.6                      |        |
| None or elementary                                               | 280                                                                    | 16.9 | 55.7  | 223        | 22.4  | 44.3  | 503         | 19.0                      |        |
| Not stated                                                       | 102                                                                    | 6.2  | 70.3  | 43         | 4.3   | 29.7  | 145         | 5.5                       |        |
| <b>Concomitant clinical conditions</b>                           |                                                                        |      |       |            |       |       |             |                           |        |
| Cancer                                                           | 62                                                                     | 3.7  | 50.0  | 62         | 6.2   | 50.0  | 124         | 4.7                       | 0.003  |
| Diabetes                                                         | 39                                                                     | 2.4  | 43.8  | 50         | 5.0   | 56.2  | 89          | 3.4                       | 0.000  |
| Lipid metabolism disorders                                       | 20                                                                     | 1.2  | 42.6  | 27         | 2.7   | 57.4  | 47          | 1.8                       | 0.004  |
| Obesity                                                          | 6                                                                      | 0.4  | 60.0  | 4          | 0.4   | 40.0  | 10          | 0.4                       | 0.870  |
| Obesity at index admission                                       | 65                                                                     | 3.9  | 64.4  | 36         | 3.6   | 35.6  | 101         | 3.8                       | 0.695  |
| Anaemias                                                         | 8                                                                      | 0.5  | 26.7  | 22         | 2.2   | 73.3  | 30          | 1.1                       | <.0001 |
| Anaemias at index admission                                      | 36                                                                     | 2.2  | 45.0  | 44         | 4.4   | 55.0  | 80          | 3.0                       | 0.001  |
| Coagulation defects                                              | 1                                                                      | 0.1  | 100.0 | —          | —     | —     | 1           | 0.0                       | 0.439  |
| Coagulation defects at index admission                           | 1                                                                      | 0.1  | 100.0 | —          | —     | —     | 1           | 0.0                       | 0.439  |
| Other haematological diseases                                    | 2                                                                      | 0.1  | 40.0  | 3          | 0.3   | 60.0  | 5           | 0.2                       | 0.298  |
| Other haematological diseases at index admission                 | 8                                                                      | 0.5  | 80.0  | 2          | 0.2   | 20.0  | 10          | 0.4                       | 0.252  |
| Arterial hypertension                                            | 92                                                                     | 5.6  | 51.7  | 86         | 8.7   | 48.3  | 178         | 6.7                       | 0.002  |
| Previous myocardial infarction                                   | 42                                                                     | 2.5  | 38.2  | 68         | 6.8   | 61.8  | 110         | 4.1                       | <.0001 |
| Other forms of ischemic heart disease                            | 60                                                                     | 3.6  | 50.8  | 58         | 5.8   | 49.2  | 118         | 4.5                       | 0.008  |
| Heart failure                                                    | 15                                                                     | 0.9  | 32.6  | 31         | 3.1   | 67.4  | 46          | 1.7                       | <.0001 |
| Not well-defined forms and complications of heart disease        | 2                                                                      | 0.1  | 33.3  | 4          | 0.4   | 66.7  | 6           | 0.2                       | 0.140  |
| Rheumatic heart disease                                          | 2                                                                      | 0.1  | 66.7  | 1          | 0.1   | 33.3  | 3           | 0.1                       | 0.882  |
| Rheumatic heart disease at index admission                       | 12                                                                     | 0.7  | 52.2  | 11         | 1.1   | 47.8  | 23          | 0.9                       | 0.304  |
| Cardiomyopathies                                                 | 2                                                                      | 0.1  | 16.7  | 10         | 1.0   | 83.3  | 12          | 0.5                       | 0.001  |
| Cardiomyopathies at index admission                              | 13                                                                     | 0.8  | 44.8  | 16         | 1.6   | 55.2  | 29          | 1.1                       | 0.048  |
| Acute endocarditis and myocarditis                               | —                                                                      | —    | —     | 1          | 0.1   | 100.0 | 1           | 0.0                       | 0.197  |
| Other cardiac conditions                                         | 1                                                                      | 0.1  | 14.3  | 6          | 0.6   | 85.7  | 7           | 0.3                       | 0.008  |
| Other cardiac conditions at index admission                      | 12                                                                     | 0.7  | 33.3  | 24         | 2.4   | 66.7  | 36          | 1.4                       | 0.000  |
| Conduction disorders and arrhythmias                             | 25                                                                     | 1.5  | 40.3  | 37         | 3.7   | 59.7  | 62          | 2.3                       | 0.000  |
| Cerebrovascular diseases                                         | 34                                                                     | 2.1  | 52.3  | 31         | 3.1   | 47.7  | 65          | 2.5                       | 0.086  |
| Cerebrovascular diseases at index admission                      | 28                                                                     | 1.7  | 40.0  | 42         | 4.2   | 60.0  | 70          | 2.6                       | <.0001 |
| Vascular diseases                                                | 13                                                                     | 0.8  | 31.0  | 29         | 2.9   | 69.0  | 42          | 1.6                       | <.0001 |
| Vascular diseases at index admission                             | 23                                                                     | 1.4  | 46.0  | 27         | 2.7   | 54.0  | 50          | 1.9                       | 0.015  |
| Chronic obstructive pulmonary disease (COPD)                     | 12                                                                     | 0.7  | 37.5  | 20         | 2.0   | 62.5  | 32          | 1.2                       | 0.003  |
| Chronic nephropathy                                              | 19                                                                     | 1.2  | 35.2  | 35         | 3.5   | 64.8  | 54          | 2.0                       | <.0001 |
| Chronic kidney disease                                           | 68                                                                     | 4.1  | 43.0  | 90         | 9.1   | 57.0  | 158         | 6.0                       | <.0001 |
| Chronic diseases (liver, pancreas, intestines)                   | 4                                                                      | 0.2  | 44.4  | 5          | 0.5   | 55.6  | 9           | 0.3                       | 0.262  |
| Chronic diseases (liver, pancreas, intestine) at index admission | 9                                                                      | 0.5  | 47.4  | 10         | 1.0   | 52.6  | 19          | 0.7                       | 0.171  |
| Previous coronary artery bypass grafting                         | 12                                                                     | 0.7  | 46.2  | 14         | 1.4   | 53.8  | 26          | 1.0                       | 0.084  |
| Previous coronary angioplasty                                    | 81                                                                     | 4.9  | 49.7  | 82         | 8.3   | 50.3  | 163         | 6.1                       | 0.001  |
| Cerebrovascular revascularization                                | 6                                                                      | 0.4  | 60.0  | 4          | 0.4   | 40.0  | 10          | 0.4                       | 0.870  |
| Other heart surgery                                              | 4                                                                      | 0.2  | 30.8  | 9          | 0.9   | 69.2  | 13          | 0.5                       | 0.018  |
| Other vessel surgery                                             | 12                                                                     | 0.7  | 34.3  | 23         | 2.3   | 65.7  | 35          | 1.3                       | 0.001  |
| <b>Type of hospital*</b>                                         |                                                                        |      |       |            |       |       |             |                           |        |
| EADI                                                             | 1008                                                                   | 60.8 | 62.4  | 607        | 61.1  | 37.6  | 1615        | 60.9                      | 0.905  |
| EADII                                                            | 649                                                                    | 39.2 | 62.6  | 387        | 38.9  | 37.4  | 1036        | 39.1                      |        |

\*EADI: Emergency Admission Department level I;

EADII: Emergency Admission Department level II;

## Ischemic Stroke patient cohort

The eligibility criteria for including patients in the stroke cohorts for calculating the two indicators considered are different, so the two cohorts are described separately.

- ✓ In hospital mortality within 30-days of first hospital admission in patients with ischemic stroke

**Table S14.** Characteristics of patients included in the ischemic stroke cohort (in hospital mortality) in 2021 and 2022 from participating facilities according to A&F intervention exposure status.

|                                                                           | Exposed     |      |      | Control     |      |       | Total       |      | $\chi^2$<br>p-value |
|---------------------------------------------------------------------------|-------------|------|------|-------------|------|-------|-------------|------|---------------------|
|                                                                           | N           | col% | row% | N           | col% | row%  | N           | col% |                     |
| <b>Total</b>                                                              | <b>3793</b> |      |      | <b>2156</b> |      |       | <b>5949</b> |      |                     |
| <b>Sex</b>                                                                |             |      |      |             |      |       |             |      | 0.848               |
| Female                                                                    | 1753        | 46.2 | 63.6 | 1002        | 46.5 | 36.4  | 2755        | 46.3 |                     |
| Male                                                                      | 2040        | 53.8 | 63.9 | 1154        | 53.5 | 36.1  | 3194        | 53.7 |                     |
| <b>Age (years)</b>                                                        |             |      |      |             |      |       |             |      | 0.095               |
| 35-66                                                                     | 967         | 25.5 | 64.1 | 541         | 25.1 | 35.9  | 1508        | 25.3 |                     |
| 67-76                                                                     | 959         | 25.3 | 65.1 | 513         | 23.8 | 34.9  | 1472        | 24.7 |                     |
| 77-83                                                                     | 925         | 24.4 | 64.7 | 504         | 23.4 | 35.3  | 1429        | 24.0 |                     |
| 84-100                                                                    | 942         | 24.8 | 61.2 | 598         | 27.7 | 38.8  | 1540        | 25.9 |                     |
| <b>Education level</b>                                                    |             |      |      |             |      |       |             |      | <.0001              |
| Bachelor's degree                                                         | 356         | 9.4  | 62.8 | 211         | 9.8  | 37.2  | 567         | 9.5  |                     |
| Lower middle high school                                                  | 997         | 26.3 | 62.4 | 602         | 27.9 | 37.6  | 1599        | 26.9 |                     |
| Middle high school                                                        | 857         | 22.6 | 62.1 | 523         | 24.3 | 37.9  | 1380        | 23.2 |                     |
| None or elementary                                                        | 1355        | 35.7 | 64.2 | 757         | 35.1 | 35.8  | 2112        | 35.5 |                     |
| Not stated                                                                | 228         | 6.0  | 78.4 | 63          | 2.9  | 21.6  | 291         | 4.9  |                     |
| <b>Concomitant clinical conditions</b>                                    |             |      |      |             |      |       |             |      |                     |
| Cancer                                                                    | 129         | 3.4  | 60.6 | 84          | 3.9  | 39.4  | 213         | 3.6  | 0.323               |
| Diabetes                                                                  | 188         | 5.0  | 65.3 | 100         | 4.6  | 34.7  | 288         | 4.8  | 0.583               |
| Lipid metabolism disorders                                                | 63          | 1.7  | 57.3 | 47          | 2.2  | 42.7  | 110         | 1.8  | 0.153               |
| Obesity                                                                   | 26          | 0.7  | 72.2 | 10          | 0.5  | 27.8  | 36          | 0.6  | 0.289               |
| Obesity at index admission                                                | 77          | 2.0  | 55.4 | 62          | 2.9  | 44.6  | 139         | 2.3  | 0.038               |
| Anaemias                                                                  | 102         | 2.7  | 60.0 | 68          | 3.2  | 40.0  | 170         | 2.9  | 0.301               |
| Anaemias at index admission                                               | 67          | 1.8  | 37.2 | 113         | 5.2  | 62.8  | 180         | 3.0  | <.0001              |
| Coagulation defects                                                       | 1           | 0.0  | 33.3 | 2           | 0.1  | 66.7  | 3           | 0.1  | 0.273               |
| Coagulation defects at index admission                                    | 2           | 0.1  | 16.7 | 10          | 0.5  | 83.3  | 12          | 0.2  | 0.001               |
| Other haematological diseases                                             | 10          | 0.3  | 66.7 | 5           | 0.2  | 33.3  | 15          | 0.3  | 0.815               |
| Other haematological diseases at index admission                          | 24          | 0.6  | 55.8 | 19          | 0.9  | 44.2  | 43          | 0.7  | 0.277               |
| Arterial hypertension                                                     | 370         | 9.8  | 62.6 | 221         | 10.3 | 37.4  | 591         | 9.9  | 0.539               |
| Previous myocardial infarction                                            | 69          | 1.8  | 54.8 | 57          | 2.6  | 45.2  | 126         | 2.1  | 0.034               |
| Other forms of ischemic heart disease                                     | 138         | 3.6  | 54.5 | 115         | 5.3  | 45.5  | 253         | 4.3  | 0.002               |
| Heart failure                                                             | 169         | 4.5  | 58.9 | 118         | 5.5  | 41.1  | 287         | 4.8  | 0.078               |
| Not well-defined forms and complications of heart disease                 | 35          | 0.9  | 85.4 | 6           | 0.3  | 14.6  | 41          | 0.7  | 0.004               |
| Rheumatic heart disease                                                   | 27          | 0.7  | 60.0 | 18          | 0.8  | 40.0  | 45          | 0.8  | 0.599               |
| Rheumatic heart disease at index admission                                | 26          | 0.7  | 43.3 | 34          | 1.6  | 56.7  | 60          | 1.0  | 0.001               |
| Cardiomyopathies                                                          | 17          | 0.5  | 56.7 | 13          | 0.6  | 43.3  | 30          | 0.5  | 0.418               |
| Cardiomyopathies at index admission                                       | 20          | 0.5  | 55.6 | 16          | 0.7  | 44.4  | 36          | 0.6  | 0.304               |
| Acute endocarditis and myocarditis                                        | 1           | 0.0  | 33.3 | 2           | 0.1  | 66.7  | 3           | 0.1  | 0.273               |
| Other cardiac conditions                                                  | 43          | 1.1  | 52.4 | 39          | 1.8  | 47.6  | 82          | 1.4  | 0.032               |
| Other cardiac conditions at index admission                               | 136         | 3.6  | 59.6 | 92          | 4.3  | 40.4  | 228         | 3.8  | 0.188               |
| Conduction disorders and arrhythmias                                      | 229         | 6.0  | 60.9 | 147         | 6.8  | 39.1  | 376         | 6.3  | 0.234               |
| Cerebrovascular diseases                                                  | 254         | 6.7  | 60.8 | 164         | 7.6  | 39.2  | 418         | 7.0  | 0.187               |
| Vascular diseases                                                         | 86          | 2.3  | 62.8 | 51          | 2.4  | 37.2  | 137         | 2.3  | 0.808               |
| Vascular diseases at index admission                                      | 157         | 4.1  | 63.3 | 91          | 4.2  | 36.7  | 248         | 4.2  | 0.880               |
| Chronic obstructive pulmonary disease (COPD)                              | 78          | 2.1  | 62.9 | 46          | 2.1  | 37.1  | 124         | 2.1  | 0.841               |
| Chronic nephropathy                                                       | 95          | 2.5  | 59.7 | 64          | 3.0  | 40.3  | 159         | 2.7  | 0.286               |
| Chronic nephropathy at index admission                                    | 149         | 3.9  | 67.7 | 71          | 3.3  | 32.3  | 220         | 3.7  | 0.212               |
| Chronic kidney disease                                                    | 25          | 0.7  | 71.4 | 10          | 0.5  | 28.6  | 35          | 0.6  | 0.344               |
| Diseases chronic diseases (liver, pancreas, intestine)                    | 28          | 0.7  | 66.7 | 14          | 0.7  | 33.3  | 42          | 0.7  | 0.694               |
| Diseases chronic diseases (liver, pancreas, intestine) at index admission | 84          | 2.2  | 58.3 | 60          | 2.8  | 41.7  | 144         | 2.4  | 0.170               |
| Cerebrovascular revascularization                                         | 16          | 0.4  | 59.3 | 11          | 0.5  | 40.7  | 27          | 0.5  | 0.626               |
| Other heart surgery                                                       | 42          | 1.1  | 62.7 | 25          | 1.2  | 37.3  | 67          | 1.1  | 0.854               |
| Other vessel surgery                                                      | 78          | 2.1  | 60.0 | 52          | 2.4  | 40.0  | 130         | 2.2  | 0.367               |
| <b>Type of hospital*</b>                                                  |             |      |      |             |      |       |             |      | <.0001              |
| noNVT                                                                     | —           | —    | —    | 125         | 5.8  | 100.0 | 125         | 2.1  |                     |
| NVT                                                                       | —           | —    | —    | 175         | 8.1  | 100.0 | 175         | 2.9  |                     |
| NTUI                                                                      | 1600        | 42.2 | 54.2 | 1351        | 62.7 | 45.8  | 2951        | 49.6 |                     |
| NTUII                                                                     | 2193        | 57.8 | 81.3 | 505         | 23.4 | 18.7  | 2698        | 45.4 |                     |

\* noNVT: Hospital without Neurovascular Treatment Team;

NVT: Hospital with a Neurovascular Treatment Team;

NTUI: Neurovascular Treatment Unit level I;

NTUII: Neurovascular Treatment Unit level II.

**Table S15.** Characteristics of patients included in the ischemic stroke cohort in 2021 (PRE) from participating facilities by in hospital 30-days mortality since first hospital admission in patients with ischemic stroke (Yes/No).

|                                                                           | In hospital 30-days mortality after admission in patients with ischemic stroke |      |      |             |      |       |             |      | $\chi^2$<br>p-value |
|---------------------------------------------------------------------------|--------------------------------------------------------------------------------|------|------|-------------|------|-------|-------------|------|---------------------|
|                                                                           | Yes                                                                            |      |      | No          |      |       | Total       |      |                     |
|                                                                           | N                                                                              | col% | row% | N           | col% | row%  | N           | col% |                     |
| <b>Total</b>                                                              | <b>232</b>                                                                     |      |      | <b>2722</b> |      |       | <b>2954</b> |      |                     |
| <b>A&amp;F intervention</b>                                               |                                                                                |      |      |             |      |       |             |      | 0.008               |
| Exposed                                                                   | 137                                                                            | 59.1 | 9.2  | 1359        | 49.9 | 90.8  | 1496        | 50.6 |                     |
| Control                                                                   | 95                                                                             | 41.0 | 6.5  | 1363        | 50.1 | 93.5  | 1458        | 49.4 |                     |
| <b>Sex</b>                                                                |                                                                                |      |      |             |      |       |             |      | 0.001               |
| Female                                                                    | 131                                                                            | 56.5 | 9.6  | 1234        | 45.3 | 90.4  | 1365        | 46.2 |                     |
| Male                                                                      | 101                                                                            | 43.5 | 6.4  | 1488        | 54.7 | 93.6  | 1589        | 53.8 |                     |
| <b>Age (years)</b>                                                        |                                                                                |      |      |             |      |       |             |      | <.0001              |
| 35-66                                                                     | 14                                                                             | 6.0  | 1.9  | 720         | 26.5 | 98.1  | 734         | 24.8 |                     |
| 67-76                                                                     | 35                                                                             | 15.1 | 4.6  | 724         | 26.6 | 95.4  | 759         | 25.7 |                     |
| 77-83                                                                     | 54                                                                             | 23.3 | 7.7  | 647         | 23.8 | 92.3  | 701         | 23.7 |                     |
| 84-100                                                                    | 129                                                                            | 55.6 | 17.0 | 631         | 23.2 | 83.0  | 760         | 25.7 |                     |
| <b>Education level</b>                                                    |                                                                                |      |      |             |      |       |             |      | 0.000               |
| Bachelor's degree                                                         | 12                                                                             | 5.2  | 4.2  | 276         | 10.1 | 95.8  | 288         | 9.7  |                     |
| Lower middle high school                                                  | 57                                                                             | 24.6 | 7.5  | 698         | 25.6 | 92.5  | 755         | 25.6 |                     |
| Middle high school                                                        | 40                                                                             | 17.2 | 5.7  | 666         | 24.5 | 94.3  | 706         | 23.9 |                     |
| None or elementary                                                        | 115                                                                            | 49.6 | 10.6 | 966         | 35.5 | 89.4  | 1081        | 36.6 |                     |
| Not stated                                                                | 8                                                                              | 3.5  | 6.5  | 116         | 4.3  | 93.5  | 124         | 4.2  |                     |
| <b>Concomitant clinical conditions</b>                                    |                                                                                |      |      |             |      |       |             |      |                     |
| Cancer                                                                    | 9                                                                              | 3.9  | 8.6  | 96          | 3.5  | 91.4  | 105         | 3.6  | 0.781               |
| Diabetes                                                                  | 14                                                                             | 6.0  | 10.4 | 121         | 4.5  | 89.6  | 135         | 4.6  | 0.266               |
| Lipid metabolism disorders                                                | 2                                                                              | 0.9  | 3.8  | 50          | 1.8  | 96.2  | 52          | 1.8  | 0.278               |
| Obesity                                                                   | 2                                                                              | 0.9  | 11.8 | 15          | 0.6  | 88.2  | 17          | 0.6  | 0.548               |
| Obesity at index admission                                                | 5                                                                              | 2.2  | 6.2  | 76          | 2.8  | 93.8  | 81          | 2.7  | 0.569               |
| Anaemias                                                                  | 12                                                                             | 5.2  | 13.2 | 79          | 2.9  | 86.8  | 91          | 3.1  | 0.055               |
| Anaemias at index admission                                               | 5                                                                              | 2.2  | 6.5  | 72          | 2.7  | 93.5  | 77          | 2.6  | 0.653               |
| Coagulation defects                                                       | —                                                                              | —    | —    | 1           | 0.0  | 100.0 | 1           | 0.0  | 0.770               |
| Coagulation defects at index admission                                    | —                                                                              | —    | —    | 10          | 0.4  | 100.0 | 10          | 0.3  | 0.355               |
| Other haematological diseases                                             | —                                                                              | —    | —    | 5           | 0.2  | 100.0 | 5           | 0.2  | 0.514               |
| Other haematological diseases at index admission                          | 4                                                                              | 1.7  | 20.0 | 16          | 0.6  | 80.0  | 20          | 0.7  | 0.043               |
| Arterial hypertension                                                     | 39                                                                             | 16.8 | 13.4 | 252         | 9.3  | 86.6  | 291         | 9.9  | 0.000               |
| Previous myocardial infarction                                            | 7                                                                              | 3.0  | 11.7 | 53          | 2.0  | 88.3  | 60          | 2.0  | 0.267               |
| Other forms of ischemic heart disease                                     | 15                                                                             | 6.5  | 11.3 | 118         | 4.3  | 88.7  | 133         | 4.5  | 0.133               |
| Heart failure                                                             | 25                                                                             | 10.8 | 16.6 | 126         | 4.6  | 83.4  | 151         | 5.1  | <.0001              |
| Not well-defined forms and complications of heart disease                 | 4                                                                              | 1.7  | 19.0 | 17          | 0.6  | 81.0  | 21          | 0.7  | 0.056               |
| Rheumatic heart disease                                                   | 5                                                                              | 2.2  | 25.0 | 15          | 0.6  | 75.0  | 20          | 0.7  | 0.004               |
| Rheumatic heart disease at index admission                                | —                                                                              | —    | —    | 29          | 1.1  | 100.0 | 29          | 1.0  | 0.114               |
| Cardiomyopathies                                                          | 2                                                                              | 0.9  | 12.5 | 14          | 0.5  | 87.5  | 16          | 0.5  | 0.489               |
| Cardiomyopathies at index admission                                       | 2                                                                              | 0.9  | 14.3 | 12          | 0.4  | 85.7  | 14          | 0.5  | 0.370               |
| Acute endocarditis and myocarditis                                        | —                                                                              | —    | —    | 3           | 0.1  | 100.0 | 3           | 0.1  | 0.613               |
| Other cardiac conditions                                                  | 8                                                                              | 3.5  | 18.2 | 36          | 1.3  | 81.8  | 44          | 1.5  | 0.010               |
| Other cardiac conditions at index admission                               | 5                                                                              | 2.2  | 4.0  | 119         | 4.4  | 96.0  | 124         | 4.2  | 0.106               |
| Conduction disorders and arrhythmias                                      | 29                                                                             | 12.5 | 15.3 | 161         | 5.9  | 84.7  | 190         | 6.4  | <.0001              |
| Cerebrovascular diseases                                                  | 19                                                                             | 8.2  | 9.0  | 191         | 7.0  | 91.0  | 210         | 7.1  | 0.505               |
| Vascular diseases                                                         | 5                                                                              | 2.2  | 8.5  | 54          | 2.0  | 91.5  | 59          | 2.0  | 0.858               |
| Vascular diseases at index admission                                      | 9                                                                              | 3.9  | 7.5  | 111         | 4.1  | 92.5  | 120         | 4.1  | 0.883               |
| Chronic obstructive pulmonary disease (COPD)                              | 11                                                                             | 4.7  | 17.2 | 53          | 2.0  | 82.8  | 64          | 2.2  | 0.005               |
| Chronic nephropathy                                                       | 9                                                                              | 3.9  | 13.4 | 58          | 2.1  | 86.6  | 67          | 2.3  | 0.086               |
| Chronic nephropathy at index admission                                    | 18                                                                             | 7.8  | 17.0 | 88          | 3.2  | 83.0  | 106         | 3.6  | 0.000               |
| Chronic kidney disease                                                    | 2                                                                              | 0.9  | 13.3 | 13          | 0.5  | 86.7  | 15          | 0.5  | 0.429               |
| Diseases chronic diseases (liver, pancreas, intestine)                    | 2                                                                              | 0.9  | 10.0 | 18          | 0.7  | 90.0  | 20          | 0.7  | 0.720               |
| Diseases chronic diseases (liver, pancreas, intestine) at index admission | 6                                                                              | 2.6  | 7.5  | 74          | 2.7  | 92.5  | 80          | 2.7  | 0.905               |
| Cerebrovascular revascularization                                         | —                                                                              | —    | —    | 15          | 0.6  | 100.0 | 15          | 0.5  | 0.257               |
| Other heart surgery                                                       | 8                                                                              | 3.5  | 22.2 | 28          | 1.0  | 77.8  | 36          | 1.2  | 0.001               |
| Other vessel surgery                                                      | 4                                                                              | 1.7  | 6.6  | 57          | 2.1  | 93.4  | 61          | 2.1  | 0.704               |
| <b>Type of hospital*</b>                                                  |                                                                                |      |      |             |      |       |             |      |                     |
| noNVT                                                                     | —                                                                              | —    | —    | 46          | 1.7  | 100.0 | 46          | 1.6  | 0.128               |
| NVT                                                                       | 10                                                                             | 4.3  | 11.0 | 81          | 3.0  | 89.0  | 91          | 3.1  |                     |
| NTUI                                                                      | 109                                                                            | 47.0 | 7.5  | 1340        | 49.2 | 92.5  | 1449        | 49.1 |                     |
| NTUII                                                                     | 113                                                                            | 48.7 | 8.3  | 1255        | 46.1 | 91.7  | 1368        | 46.3 |                     |

\* noNVT: Hospital without Neurovascular Treatment Team;

NVT: Hospital with a Neurovascular Treatment Team;

NTUI: Neurovascular Treatment Unit level I;

NTUII: Neurovascular Treatment Unit level II.

**Table S16.** Characteristics of patients included in the ischemic stroke cohort in 2022 (POST) from participating facilities by in hospital 30-days mortality since first hospital admission in patients with ischemic stroke (Yes/No).

|                                                                           | In hospital 30-days mortality after admission in patients with ischemic stroke |      |      |      |      |       |       |      | χ <sup>2</sup><br>p-value |
|---------------------------------------------------------------------------|--------------------------------------------------------------------------------|------|------|------|------|-------|-------|------|---------------------------|
|                                                                           | Yes                                                                            |      |      | No   |      |       | Total |      |                           |
|                                                                           | N                                                                              | col% | row% | N    | col% | row%  | N     | col% |                           |
| Total                                                                     | 200                                                                            |      |      | 2795 |      |       | 2995  |      |                           |
| A&F intervention                                                          |                                                                                |      |      |      |      |       |       |      | 0.236                     |
| Exposed                                                                   | 112                                                                            | 56.0 | 7.2  | 1444 | 51.7 | 92.8  | 1556  | 52.0 |                           |
| Control                                                                   | 88                                                                             | 44.0 | 6.1  | 1351 | 48.3 | 93.9  | 1439  | 48.0 |                           |
| Sex                                                                       |                                                                                |      |      |      |      |       |       |      | 0.005                     |
| Female                                                                    | 112                                                                            | 56.0 | 8.1  | 1278 | 45.7 | 91.9  | 1390  | 46.4 |                           |
| Male                                                                      | 88                                                                             | 44.0 | 5.5  | 1517 | 54.3 | 94.5  | 1605  | 53.6 |                           |
| Age (years)                                                               |                                                                                |      |      |      |      |       |       |      | <.0001                    |
| 35-66                                                                     | 12                                                                             | 6.0  | 1.6  | 762  | 27.3 | 98.4  | 774   | 25.8 |                           |
| 67-76                                                                     | 36                                                                             | 18.0 | 5.0  | 677  | 24.2 | 95.0  | 713   | 23.8 |                           |
| 77-83                                                                     | 57                                                                             | 28.5 | 7.8  | 671  | 24.0 | 92.2  | 728   | 24.3 |                           |
| 84-100                                                                    | 95                                                                             | 47.5 | 12.2 | 685  | 24.5 | 87.8  | 780   | 26.0 |                           |
| Education level                                                           |                                                                                |      |      |      |      |       |       |      | 0.001                     |
| Bachelor's degree                                                         | 12                                                                             | 6.0  | 4.3  | 267  | 9.6  | 95.7  | 279   | 9.3  |                           |
| Lower middle high school                                                  | 50                                                                             | 25.0 | 5.9  | 794  | 28.4 | 94.1  | 844   | 28.2 |                           |
| Middle high school                                                        | 36                                                                             | 18.0 | 5.3  | 638  | 22.8 | 94.7  | 674   | 22.5 |                           |
| None or elementary                                                        | 96                                                                             | 48.0 | 9.3  | 935  | 33.5 | 90.7  | 1031  | 34.4 |                           |
| Not stated                                                                | 6                                                                              | 3.0  | 3.6  | 161  | 5.8  | 96.4  | 167   | 5.6  |                           |
| Concomitant clinical conditions                                           |                                                                                |      |      |      |      |       |       | 0.0  |                           |
| Cancer                                                                    | 12                                                                             | 6.0  | 11.1 | 96   | 3.4  | 88.9  | 108   | 3.6  | 0.060                     |
| Diabetes                                                                  | 20                                                                             | 10.0 | 13.1 | 133  | 4.8  | 86.9  | 153   | 5.1  | 0.001                     |
| Lipid metabolism disorders                                                | 5                                                                              | 2.5  | 8.6  | 53   | 1.9  | 91.4  | 58    | 1.9  | 0.550                     |
| Obesity                                                                   | 2                                                                              | 1.0  | 10.5 | 17   | 0.6  | 89.5  | 19    | 0.6  | 0.500                     |
| Obesity at index admission                                                | 4                                                                              | 2.0  | 6.9  | 54   | 1.9  | 93.1  | 58    | 1.9  | 0.946                     |
| Anaemias                                                                  | 11                                                                             | 5.5  | 13.9 | 68   | 2.4  | 86.1  | 79    | 2.6  | 0.009                     |
| Anaemias at index admission                                               | 6                                                                              | 3.0  | 5.8  | 97   | 3.5  | 94.2  | 103   | 3.4  | 0.724                     |
| Coagulation defects                                                       | —                                                                              | —    | —    | 2    | 0.1  | 100.0 | 2     | 0.1  | 0.705                     |
| Coagulation defects at index admission                                    | 1                                                                              | 0.5  | 50.0 | 1    | 0.0  | 50.0  | 2     | 0.1  | 0.014                     |
| Other haematological diseases                                             | 1                                                                              | 0.5  | 10.0 | 9    | 0.3  | 90.0  | 10    | 0.3  | 0.673                     |
| Other haematological diseases at index admission                          | —                                                                              | —    | —    | 23   | 0.8  | 100.0 | 23    | 0.8  | 0.198                     |
| Arterial hypertension                                                     | 32                                                                             | 16.0 | 10.7 | 268  | 9.6  | 89.3  | 300   | 10.0 | 0.004                     |
| Previous myocardial infarction                                            | 7                                                                              | 3.5  | 10.6 | 59   | 2.1  | 89.4  | 66    | 2.2  | 0.196                     |
| Other forms of ischemic heart disease                                     | 12                                                                             | 6.0  | 10.0 | 108  | 3.9  | 90.0  | 120   | 4.0  | 0.137                     |
| Heart failure                                                             | 25                                                                             | 12.5 | 18.4 | 111  | 4.0  | 81.6  | 136   | 4.5  | <.0001                    |
| Not well-defined forms and complications of heart disease                 | —                                                                              | —    | —    | 20   | 0.7  | 100.0 | 20    | 0.7  | 0.230                     |
| Rheumatic heart disease                                                   | 3                                                                              | 1.5  | 12.0 | 22   | 0.8  | 88.0  | 25    | 0.8  | 0.284                     |
| Rheumatic heart disease at index admission                                | 2                                                                              | 1.0  | 6.5  | 29   | 1.0  | 93.5  | 31    | 1.0  | 0.960                     |
| Cardiomyopathies                                                          | 1                                                                              | 0.5  | 7.1  | 13   | 0.5  | 92.9  | 14    | 0.5  | 0.944                     |
| Cardiomyopathies at index admission                                       | 1                                                                              | 0.5  | 4.5  | 21   | 0.8  | 95.5  | 22    | 0.7  | 0.688                     |
| Acute endocarditis and myocarditis                                        | —                                                                              | —    | —    | —    | —    | —     | —     | —    | —                         |
| Other cardiac conditions                                                  | 4                                                                              | 2.0  | 10.5 | 34   | 1.2  | 89.5  | 38    | 1.3  | 0.339                     |
| Other cardiac conditions at index admission                               | 3                                                                              | 1.5  | 2.9  | 101  | 3.6  | 97.1  | 104   | 3.5  | 0.115                     |
| Conduction disorders and arrhythmias                                      | 26                                                                             | 13.0 | 14.0 | 160  | 5.7  | 86.0  | 186   | 6.2  | <.0001                    |
| Cerebrovascular diseases                                                  | 21                                                                             | 10.5 | 10.1 | 187  | 6.7  | 89.9  | 208   | 6.9  | 0.041                     |
| Vascular diseases                                                         | 6                                                                              | 3.0  | 7.7  | 72   | 2.6  | 92.3  | 78    | 2.6  | 0.716                     |
| Vascular diseases at index admission                                      | 6                                                                              | 3.0  | 4.7  | 122  | 4.4  | 95.3  | 128   | 4.3  | 0.357                     |
| Chronic obstructive pulmonary disease (COPD)                              | 10                                                                             | 5.0  | 16.7 | 50   | 1.8  | 83.3  | 60    | 2.0  | 0.002                     |
| Chronic nephropathy                                                       | 17                                                                             | 8.5  | 18.5 | 75   | 2.7  | 81.5  | 92    | 3.1  | <.0001                    |
| Chronic nephropathy at index admission                                    | 11                                                                             | 5.5  | 9.6  | 103  | 3.7  | 90.4  | 114   | 3.8  | 0.195                     |
| Chronic kidney disease                                                    | 1                                                                              | 0.5  | 5.0  | 19   | 0.7  | 95.0  | 20    | 0.7  | 0.763                     |
| Diseases chronic diseases (liver, pancreas, intestine)                    | —                                                                              | —    | —    | 22   | 0.8  | 100.0 | 22    | 0.7  | 0.208                     |
| Diseases chronic diseases (liver, pancreas, intestine) at index admission | 3                                                                              | 1.5  | 4.7  | 61   | 2.2  | 95.3  | 64    | 2.1  | 0.519                     |
| Cerebrovascular revascularization                                         | —                                                                              | —    | —    | 12   | 0.4  | 100.0 | 12    | 0.4  | 0.353                     |
| Other heart surgery                                                       | 5                                                                              | 2.5  | 16.1 | 26   | 0.9  | 83.9  | 31    | 1.0  | 0.034                     |
| Other vessel surgery                                                      | 7                                                                              | 3.5  | 10.1 | 62   | 2.2  | 89.9  | 69    | 2.3  | 0.243                     |
| Type of hospital*                                                         | 15                                                                             | 7.5  | 19.0 | 64   | 2.3  | 81.0  | 79    | 2.6  | <.0001                    |
| noNVT                                                                     | —                                                                              | —    | —    | —    | —    | —     | —     | —    | —                         |
| NVT                                                                       | 1                                                                              | 0.5  | 1.2  | 83   | 3.0  | 98.8  | 84    | 2.8  |                           |
| NTUI                                                                      | 100                                                                            | 50.0 | 6.7  | 1402 | 50.2 | 93.3  | 1502  | 50.2 |                           |
| NTUII                                                                     | 84                                                                             | 42.0 | 6.3  | 1246 | 44.6 | 93.7  | 1330  | 44.4 |                           |

\* noNVT: Hospital without Neurovascular Treatment Team;

NVT: Hospital with a Neurovascular Treatment Team;

NTUI: Neurovascular Treatment Unit level I;

NTUII: Neurovascular Treatment Unit level II.

✓ Hospital readmissions within 30-days of discharge for ischemic stroke

**Table S17.** Characteristics of patients included in the ischemic stroke cohort (hospital readmissions) in 2021 and 2022 from participating facilities according to A&F intervention exposure status.

|                                                                           | Exposed     |      |      | Control     |      |       | Total       |      | $\chi^2$<br>p-value |
|---------------------------------------------------------------------------|-------------|------|------|-------------|------|-------|-------------|------|---------------------|
|                                                                           | N           | col% | row% | N           | col% | row%  | N           | col% |                     |
| <b>Total</b>                                                              | <b>3471</b> |      |      | <b>1982</b> |      |       | <b>5453</b> |      |                     |
| <b>Sex</b>                                                                |             |      |      |             |      |       |             |      | 0.928               |
| Female                                                                    | 1577        | 45.4 | 63.6 | 903         | 45.6 | 36.4  | 2480        | 45.5 |                     |
| Male                                                                      | 1894        | 54.6 | 63.7 | 1079        | 54.4 | 36.3  | 2973        | 54.5 |                     |
| <b>Age (years)</b>                                                        |             |      |      |             |      |       |             |      | 0.046               |
| 35-66                                                                     | 874         | 25.2 | 63.9 | 493         | 24.9 | 36.1  | 1367        | 25.1 |                     |
| 67-76                                                                     | 872         | 25.1 | 65.0 | 469         | 23.7 | 35.0  | 1341        | 24.6 |                     |
| 77-83                                                                     | 941         | 27.1 | 65.0 | 507         | 25.6 | 35.0  | 1448        | 26.6 |                     |
| 84-100                                                                    | 784         | 22.6 | 60.4 | 513         | 25.9 | 39.6  | 1297        | 23.8 |                     |
| <b>Education level</b>                                                    |             |      |      |             |      |       |             |      | <.0001              |
| Bachelor's degree                                                         | 337         | 9.7  | 62.5 | 202         | 10.2 | 37.5  | 539         | 9.9  |                     |
| Lower middle high school                                                  | 919         | 26.5 | 62.1 | 561         | 28.3 | 37.9  | 1480        | 27.1 |                     |
| Middle high school                                                        | 800         | 23.1 | 61.9 | 492         | 24.8 | 38.1  | 1292        | 23.7 |                     |
| None or elementary                                                        | 1201        | 34.6 | 64.3 | 667         | 33.7 | 35.7  | 1868        | 34.3 |                     |
| Not stated                                                                | 214         | 6.2  | 78.1 | 60          | 3.0  | 21.9  | 274         | 5.0  |                     |
| <b>Concomitant clinical conditions</b>                                    |             |      |      |             |      |       |             |      |                     |
| Cancer                                                                    | 113         | 3.3  | 59.2 | 78          | 3.9  | 40.8  | 191         | 3.5  | 0.189               |
| Diabetes                                                                  | 160         | 4.6  | 64.0 | 90          | 4.5  | 36.0  | 250         | 4.6  | 0.907               |
| Lipid metabolism disorders                                                | 59          | 1.7  | 59.0 | 41          | 2.1  | 41.0  | 100         | 1.8  | 0.329               |
| Obesity                                                                   | 23          | 0.7  | 71.9 | 9           | 0.5  | 28.1  | 32          | 0.6  | 0.332               |
| Obesity at index admission                                                | 73          | 2.1  | 56.6 | 56          | 2.8  | 43.4  | 129         | 2.4  | 0.091               |
| Anaemias                                                                  | 89          | 2.6  | 61.4 | 56          | 2.8  | 38.6  | 145         | 2.7  | 0.564               |
| Anaemias at index admission                                               | 60          | 1.7  | 37.3 | 101         | 5.1  | 62.7  | 161         | 3.0  | <.0001              |
| Coagulation defects                                                       | 1           | 0.0  | 33.3 | 2           | 0.1  | 66.7  | 3           | 0.1  | 0.275               |
| Coagulation defects at index admission                                    | —           | —    | —    | 10          | 0.5  | 100.0 | 10          | 0.2  | <.0001              |
| Other haematological diseases                                             | 9           | 0.3  | 64.3 | 5           | 0.3  | 35.7  | 14          | 0.3  | 0.961               |
| Other haematological diseases at index admission                          | 21          | 0.6  | 55.3 | 17          | 0.9  | 44.7  | 38          | 0.7  | 0.281               |
| Arterial hypertension                                                     | 322         | 9.3  | 62.4 | 194         | 9.8  | 37.6  | 516         | 9.5  | 0.535               |
| Previous myocardial infarction                                            | 60          | 1.7  | 54.1 | 51          | 2.6  | 45.9  | 111         | 2.0  | 0.034               |
| Other forms of ischemic heart disease                                     | 122         | 3.5  | 55.0 | 100         | 5.1  | 45.0  | 222         | 4.1  | 0.006               |
| Heart failure                                                             | 132         | 3.8  | 56.4 | 102         | 5.2  | 43.6  | 234         | 4.3  | 0.019               |
| Not well-defined forms and complications of heart disease                 | 31          | 0.9  | 83.8 | 6           | 0.3  | 16.2  | 37          | 0.7  | 0.011               |
| Rheumatic heart disease                                                   | 21          | 0.6  | 58.3 | 15          | 0.8  | 41.7  | 36          | 0.7  | 0.506               |
| Rheumatic heart disease at index admission                                | 24          | 0.7  | 42.1 | 33          | 1.7  | 57.9  | 57          | 1.0  | 0.001               |
| Cardiomyopathies                                                          | 14          | 0.4  | 51.9 | 13          | 0.7  | 48.1  | 27          | 0.5  | 0.201               |
| Cardiomyopathies at index admission                                       | 19          | 0.6  | 57.6 | 14          | 0.7  | 42.4  | 33          | 0.6  | 0.467               |
| Acute endocarditis and myocarditis                                        | 1           | 0.0  | 33.3 | 2           | 0.1  | 66.7  | 3           | 0.1  | 0.275               |
| Other cardiac conditions                                                  | 34          | 1.0  | 50.0 | 34          | 1.7  | 50.0  | 68          | 1.2  | 0.019               |
| Other cardiac conditions at index admission                               | 129         | 3.7  | 58.9 | 90          | 4.5  | 41.1  | 219         | 4.0  | 0.136               |
| Conduction disorders and arrhythmias                                      | 192         | 5.5  | 60.8 | 124         | 6.3  | 39.2  | 316         | 5.8  | 0.271               |
| Cerebrovascular diseases                                                  | 224         | 6.5  | 60.2 | 148         | 7.5  | 39.8  | 372         | 6.8  | 0.153               |
| Vascular diseases                                                         | 77          | 2.2  | 61.6 | 48          | 2.4  | 38.4  | 125         | 2.3  | 0.629               |
| Vascular diseases at index admission                                      | 143         | 4.1  | 61.6 | 89          | 4.5  | 38.4  | 232         | 4.3  | 0.514               |
| Chronic obstructive pulmonary disease (COPD)                              | 67          | 1.9  | 65.0 | 36          | 1.8  | 35.0  | 103         | 1.9  | 0.766               |
| Chronic nephropathy                                                       | 77          | 2.2  | 58.8 | 54          | 2.7  | 41.2  | 131         | 2.4  | 0.240               |
| Chronic nephropathy at index admission                                    | 129         | 3.7  | 68.3 | 60          | 3.0  | 31.7  | 189         | 3.5  | 0.181               |
| Chronic kidney disease                                                    | 23          | 0.7  | 71.9 | 9           | 0.5  | 28.1  | 32          | 0.6  | 0.332               |
| Diseases chronic diseases (liver, pancreas, intestine)                    | 25          | 0.7  | 64.1 | 14          | 0.7  | 35.9  | 39          | 0.7  | 0.953               |
| Diseases chronic diseases (liver, pancreas, intestine) at index admission | 77          | 2.2  | 58.3 | 55          | 2.8  | 41.7  | 132         | 2.4  | 0.198               |
| Cerebrovascular revascularization                                         | 16          | 0.5  | 59.3 | 11          | 0.6  | 40.7  | 27          | 0.5  | 0.634               |
| Other heart surgery                                                       | 32          | 0.9  | 60.4 | 21          | 1.1  | 39.6  | 53          | 1.0  | 0.618               |
| Other vessel surgery                                                      | 67          | 1.9  | 57.8 | 49          | 2.5  | 42.2  | 116         | 2.1  | 0.182               |
| <b>Type of hospital*</b>                                                  |             |      |      |             |      |       |             |      | <.0001              |
| noNVT                                                                     | —           | —    | —    | 110         | 5.6  | 100.0 | 110         | 2.0  |                     |
| NVT                                                                       | —           | —    | —    | 162         | 8.2  | 100.0 | 162         | 3.0  |                     |
| NTUI                                                                      | 1453        | 41.9 | 53.8 | 1250        | 63.1 | 46.2  | 2703        | 49.6 |                     |
| NTUII                                                                     | 2018        | 58.1 | 81.4 | 460         | 23.2 | 18.6  | 2478        | 45.4 |                     |

\* noNVT: Hospital without Neurovascular Treatment Team;

NVT: Hospital with a Neurovascular Treatment Team;

NTUI: Neurovascular Treatment Unit level I;

NTUII: Neurovascular Treatment Unit level II.

**Table S18.** Characteristics of patients included in the stroke cohort in 2021 (PRE) from participating facilities according to in hospital readmissions within 30-days of discharge for ischemic stroke (Yes/No).

|                                                                           | % of in hospital readmissions within 30-days of discharge for ischemic stroke |      |      |      |      |       |       |      | χ <sup>2</sup><br>p-value |
|---------------------------------------------------------------------------|-------------------------------------------------------------------------------|------|------|------|------|-------|-------|------|---------------------------|
|                                                                           | Yes                                                                           |      |      | No   |      |       | Total |      |                           |
|                                                                           | N                                                                             | col% | row% | N    | col% | row%  | N     | col% |                           |
| Total                                                                     | 182                                                                           |      |      | 2503 |      |       | 2685  |      |                           |
| A&F intervention                                                          |                                                                               |      |      |      |      |       |       |      | 0.819                     |
| Exposed                                                                   | 93                                                                            | 51.1 | 6.9  | 1257 | 50.2 | 93.1  | 1350  | 50.3 |                           |
| Control                                                                   | 89                                                                            | 48.9 | 6.7  | 1246 | 49.8 | 93.3  | 1335  | 49.7 |                           |
| Sex                                                                       |                                                                               |      |      |      |      |       |       | 0.0  | 0.297                     |
| Female                                                                    | 76                                                                            | 41.8 | 6.2  | 1145 | 45.8 | 93.8  | 1221  | 45.5 |                           |
| Male                                                                      | 106                                                                           | 58.2 | 7.2  | 1358 | 54.3 | 92.8  | 1464  | 54.5 |                           |
| Age (years)                                                               |                                                                               |      |      |      |      |       |       | 0.0  | 0.295                     |
| 35-66                                                                     | 35                                                                            | 19.2 | 5.4  | 617  | 24.7 | 94.6  | 652   | 24.3 |                           |
| 67-76                                                                     | 57                                                                            | 31.3 | 8.0  | 657  | 26.3 | 92.0  | 714   | 26.6 |                           |
| 77-83                                                                     | 48                                                                            | 26.4 | 6.9  | 648  | 25.9 | 93.1  | 696   | 25.9 |                           |
| 84-100                                                                    | 42                                                                            | 23.1 | 6.7  | 581  | 23.2 | 93.3  | 623   | 23.2 |                           |
| Education level                                                           |                                                                               |      |      |      |      |       |       | 0.0  | 0.644                     |
| Bachelor's degree                                                         | 19                                                                            | 10.4 | 7.0  | 254  | 10.2 | 93.0  | 273   | 10.2 |                           |
| Lower middle high school                                                  | 49                                                                            | 26.9 | 7.1  | 642  | 25.7 | 92.9  | 691   | 25.7 |                           |
| Middle high school                                                        | 39                                                                            | 21.4 | 5.9  | 619  | 24.7 | 94.1  | 658   | 24.5 |                           |
| None or elementary                                                        | 70                                                                            | 38.5 | 7.4  | 878  | 35.1 | 92.6  | 948   | 35.3 |                           |
| Not stated                                                                | 5                                                                             | 2.8  | 4.3  | 110  | 4.4  | 95.7  | 115   | 4.3  |                           |
| Concomitant clinical conditions                                           |                                                                               |      |      |      |      |       |       | 0.0  |                           |
| Cancer                                                                    | 9                                                                             | 5.0  | 9.5  | 86   | 3.4  | 90.5  | 95    | 3.5  | 0.287                     |
| Diabetes                                                                  | 6                                                                             | 3.3  | 5.1  | 112  | 4.5  | 94.9  | 118   | 4.4  | 0.454                     |
| Lipid metabolism disorders                                                | 4                                                                             | 2.2  | 8.3  | 44   | 1.8  | 91.7  | 48    | 1.8  | 0.665                     |
| Obesity                                                                   | 2                                                                             | 1.1  | 13.3 | 13   | 0.5  | 86.7  | 15    | 0.6  | 0.311                     |
| Obesity at index admission                                                | 3                                                                             | 1.7  | 4.0  | 72   | 2.9  | 96.0  | 75    | 2.8  | 0.332                     |
| Anaemias                                                                  | 3                                                                             | 1.7  | 3.9  | 74   | 3.0  | 96.1  | 77    | 2.9  | 0.307                     |
| Anaemias at index admission                                               | 1                                                                             | 0.6  | 1.5  | 67   | 2.7  | 98.5  | 68    | 2.5  | 0.078                     |
| Coagulation defects                                                       | —                                                                             | —    | —    | 1    | 0.0  | 100.0 | 1     | 0.0  | 0.787                     |
| Coagulation defects at index admission                                    | 1                                                                             | 0.6  | 10.0 | 9    | 0.4  | 90.0  | 10    | 0.4  | 0.685                     |
| Other haematological diseases                                             | —                                                                             | —    | —    | 5    | 0.2  | 100.0 | 5     | 0.2  | 0.546                     |
| Other haematological diseases at index admission                          | —                                                                             | —    | —    | 16   | 0.6  | 100.0 | 16    | 0.6  | 0.279                     |
| Arterial hypertension                                                     | 14                                                                            | 7.7  | 5.6  | 235  | 9.4  | 94.4  | 249   | 9.3  | 0.446                     |
| Previous myocardial infarction                                            | 3                                                                             | 1.7  | 5.8  | 49   | 2.0  | 94.2  | 52    | 1.9  | 0.770                     |
| Other forms of ischemic heart disease                                     | 9                                                                             | 5.0  | 7.8  | 106  | 4.2  | 92.2  | 115   | 4.3  | 0.648                     |
| Heart failure                                                             | 12                                                                            | 6.6  | 9.8  | 111  | 4.4  | 90.2  | 123   | 4.6  | 0.179                     |
| Not well-defined forms and complications of heart disease                 | 1                                                                             | 0.6  | 5.9  | 16   | 0.6  | 94.1  | 17    | 0.6  | 0.883                     |
| Rheumatic heart disease                                                   | 1                                                                             | 0.6  | 7.1  | 13   | 0.5  | 92.9  | 14    | 0.5  | 0.957                     |
| Rheumatic heart disease at index admission                                | 9                                                                             | 5.0  | 32.1 | 19   | 0.8  | 67.9  | 28    | 1.0  | <.0001                    |
| Cardiomyopathies                                                          | —                                                                             | —    | —    | 14   | 0.6  | 100.0 | 14    | 0.5  | 0.312                     |
| Cardiomyopathies at index admission                                       | —                                                                             | —    | —    | 12   | 0.5  | 100.0 | 12    | 0.4  | 0.349                     |
| Acute endocarditis and myocarditis                                        | —                                                                             | —    | —    | 3    | 0.1  | 100.0 | 3     | 0.1  | 0.640                     |
| Other cardiac conditions                                                  | 4                                                                             | 2.2  | 11.8 | 30   | 1.2  | 88.2  | 34    | 1.3  | 0.244                     |
| Other cardiac conditions at index admission                               | 8                                                                             | 4.4  | 6.8  | 110  | 4.4  | 93.2  | 118   | 4.4  | 1.000                     |
| Conduction disorders and arrhythmias                                      | 13                                                                            | 7.1  | 8.2  | 145  | 5.8  | 91.8  | 158   | 5.9  | 0.455                     |
| Cerebrovascular diseases                                                  | 20                                                                            | 11.0 | 10.6 | 169  | 6.8  | 89.4  | 189   | 7.0  | 0.031                     |
| Vascular diseases                                                         | 3                                                                             | 1.7  | 5.6  | 51   | 2.0  | 94.4  | 54    | 2.0  | 0.718                     |
| Vascular diseases at index admission                                      | 4                                                                             | 2.2  | 3.6  | 106  | 4.2  | 96.4  | 110   | 4.1  | 0.181                     |
| Chronic obstructive pulmonary disease (COPD)                              | 5                                                                             | 2.8  | 9.4  | 48   | 1.9  | 90.6  | 53    | 2.0  | 0.437                     |
| Chronic nephropathy                                                       | 9                                                                             | 5.0  | 15.5 | 49   | 2.0  | 84.5  | 58    | 2.2  | 0.007                     |
| Chronic nephropathy at index admission                                    | 9                                                                             | 5.0  | 10.2 | 79   | 3.2  | 89.8  | 88    | 3.3  | 0.191                     |
| Chronic kidney disease                                                    | 3                                                                             | 1.7  | 23.1 | 10   | 0.4  | 76.9  | 13    | 0.5  | 0.019                     |
| Diseases chronic diseases (liver, pancreas, intestine)                    | 1                                                                             | 0.6  | 5.9  | 16   | 0.6  | 94.1  | 17    | 0.6  | 0.883                     |
| Diseases chronic diseases (liver, pancreas, intestine) at index admission | 6                                                                             | 3.3  | 8.3  | 66   | 2.6  | 91.7  | 72    | 2.7  | 0.595                     |
| Cerebrovascular revascularization                                         | —                                                                             | —    | —    | 15   | 0.6  | 100.0 | 15    | 0.6  | 0.295                     |
| Other heart surgery                                                       | 4                                                                             | 2.2  | 14.8 | 23   | 0.9  | 85.2  | 27    | 1.0  | 0.095                     |
| Other vessel surgery                                                      | 3                                                                             | 1.7  | 5.5  | 52   | 2.1  | 94.5  | 55    | 2.0  | 0.693                     |
| Type of hospital*                                                         |                                                                               |      |      |      |      |       |       | 0.0  | 0.591                     |
| noNVT                                                                     | 2                                                                             | 1.1  | 4.3  | 44   | 1.8  | 95.7  | 46    | 1.7  |                           |
| NVT                                                                       | 8                                                                             | 4.4  | 10.1 | 71   | 2.8  | 89.9  | 79    | 2.9  |                           |
| NTUI                                                                      | 87                                                                            | 47.8 | 6.6  | 1232 | 49.2 | 93.4  | 1319  | 49.1 |                           |
| NTUII                                                                     | 85                                                                            | 46.7 | 6.8  | 1156 | 46.2 | 93.2  | 1241  | 46.2 |                           |

\* noNVT: Hospital without Neurovascular Treatment Team;

NVT: Hospital with a Neurovascular Treatment Team;

NTUI: Neurovascular Treatment Unit level I;

NTUII: Neurovascular Treatment Unit level II.

**Table S19.** Characteristics of patients included in the stroke cohort in 2022 (POST) from participating facilities according to in hospital readmissions within 30-days of discharge for ischemic stroke (Yes/No).

|                                                                           | % of in hospital readmissions within 30-days of discharge for ischemic stroke |      |      |      |      |       |       |      | χ <sup>2</sup><br>p-value |
|---------------------------------------------------------------------------|-------------------------------------------------------------------------------|------|------|------|------|-------|-------|------|---------------------------|
|                                                                           | Yes                                                                           |      |      | No   |      |       | Total |      |                           |
|                                                                           | N                                                                             | col% | row% | N    | col% | row%  | N     | col% |                           |
| Total                                                                     | 210                                                                           |      |      | 2558 |      |       | 2768  |      |                           |
| A&F intervention                                                          |                                                                               |      |      |      |      |       |       |      | 0.935                     |
| Exposed                                                                   | 108                                                                           | 51.4 | 7.5  | 1323 | 51.7 | 92.5  | 1431  | 51.7 |                           |
| Control                                                                   | 102                                                                           | 48.6 | 7.6  | 1235 | 48.3 | 92.4  | 1337  | 48.3 |                           |
| Sex                                                                       |                                                                               |      |      |      |      |       |       |      | 0.071                     |
| Female                                                                    | 83                                                                            | 39.5 | 6.6  | 1176 | 46.0 | 93.4  | 1259  | 45.5 |                           |
| Male                                                                      | 127                                                                           | 60.5 | 8.4  | 1382 | 54.0 | 91.6  | 1509  | 54.5 |                           |
| Age (years)                                                               |                                                                               |      |      |      |      |       |       |      | 0.002                     |
| 35-66                                                                     | 36                                                                            | 17.1 | 5.0  | 679  | 26.5 | 95.0  | 715   | 25.8 |                           |
| 67-76                                                                     | 44                                                                            | 21.0 | 7.0  | 583  | 22.8 | 93.0  | 627   | 22.7 |                           |
| 77-83                                                                     | 77                                                                            | 36.7 | 10.2 | 675  | 26.4 | 89.8  | 752   | 27.2 |                           |
| 84-100                                                                    | 53                                                                            | 25.2 | 7.9  | 621  | 24.3 | 92.1  | 674   | 24.3 |                           |
| Education level                                                           |                                                                               |      |      |      |      |       |       |      | 0.312                     |
| Bachelor's degree                                                         | 22                                                                            | 10.5 | 8.3  | 244  | 9.5  | 91.7  | 266   | 9.6  |                           |
| Lower middle high school                                                  | 47                                                                            | 22.4 | 6.0  | 742  | 29.0 | 94.0  | 789   | 28.5 |                           |
| Middle high school                                                        | 51                                                                            | 24.3 | 8.0  | 583  | 22.8 | 92.0  | 634   | 22.9 |                           |
| None or elementary                                                        | 79                                                                            | 37.6 | 8.6  | 841  | 32.9 | 91.4  | 920   | 33.2 |                           |
| Not stated                                                                | 11                                                                            | 5.2  | 6.9  | 148  | 5.8  | 93.1  | 159   | 5.7  |                           |
| Concomitant clinical conditions                                           |                                                                               |      |      |      |      |       |       |      |                           |
| Cancer                                                                    | 7                                                                             | 3.3  | 7.3  | 89   | 3.5  | 92.7  | 96    | 3.5  | 0.912                     |
| Diabetes                                                                  | 12                                                                            | 5.7  | 9.1  | 120  | 4.7  | 90.9  | 132   | 4.8  | 0.504                     |
| Lipid metabolism disorders                                                | 3                                                                             | 1.4  | 5.8  | 49   | 1.9  | 94.2  | 52    | 1.9  | 0.617                     |
| Obesity                                                                   | 2                                                                             | 1.0  | 11.8 | 15   | 0.6  | 88.2  | 17    | 0.6  | 0.514                     |
| Obesity at index admission                                                | 1                                                                             | 0.5  | 1.9  | 53   | 2.1  | 98.1  | 54    | 2.0  | 0.108                     |
| Anaemias                                                                  | 9                                                                             | 4.3  | 13.2 | 59   | 2.3  | 86.8  | 68    | 2.5  | 0.075                     |
| Anaemias at index admission                                               | 11                                                                            | 5.2  | 11.8 | 82   | 3.2  | 88.2  | 93    | 3.4  | 0.116                     |
| Coagulation defects                                                       | 1                                                                             | 0.5  | 50.0 | 1    | 0.0  | 50.0  | 2     | 0.1  | 0.023                     |
| Coagulation defects at index admission                                    |                                                                               |      |      |      |      |       |       |      |                           |
| Other haematological diseases                                             | 1                                                                             | 0.5  | 11.1 | 8    | 0.3  | 88.9  | 9     | 0.3  | 0.689                     |
| Other haematological diseases at index admission                          | 2                                                                             | 1.0  | 9.1  | 20   | 0.8  | 90.9  | 22    | 0.8  | 0.789                     |
| Arterial hypertension                                                     | 21                                                                            | 10.0 | 7.9  | 246  | 9.6  | 92.1  | 267   | 9.6  | 0.857                     |
| Previous myocardial infarction                                            | 4                                                                             | 1.9  | 6.8  | 55   | 2.2  | 93.2  | 59    | 2.1  | 0.813                     |
| Other forms of ischemic heart disease                                     | 8                                                                             | 3.8  | 7.5  | 99   | 3.9  | 92.5  | 107   | 3.9  | 0.965                     |
| Heart failure                                                             | 15                                                                            | 7.1  | 13.5 | 96   | 3.8  | 86.5  | 111   | 4.0  | 0.016                     |
| Not well-defined forms and complications of heart disease                 | 3                                                                             | 1.4  | 15.0 | 17   | 0.7  | 85.0  | 20    | 0.7  | 0.209                     |
| Rheumatic heart disease                                                   | 4                                                                             | 1.9  | 18.2 | 18   | 0.7  | 81.8  | 22    | 0.8  | 0.060                     |
| Rheumatic heart disease at index admission                                | 1                                                                             | 0.5  | 3.4  | 28   | 1.1  | 96.6  | 29    | 1.0  | 0.398                     |
| Cardiomyopathies                                                          | 1                                                                             | 0.5  | 7.7  | 12   | 0.5  | 92.3  | 13    | 0.5  | 0.989                     |
| Cardiomyopathies at index admission                                       | 3                                                                             | 1.4  | 14.3 | 18   | 0.7  | 85.7  | 21    | 0.8  | 0.245                     |
| Acute endocarditis and myocarditis                                        |                                                                               |      |      |      |      |       |       |      |                           |
| Other cardiac conditions                                                  | 4                                                                             | 1.9  | 11.8 | 30   | 1.2  | 88.2  | 34    | 1.2  | 0.355                     |
| Other cardiac conditions at index admission                               | 8                                                                             | 3.8  | 7.9  | 93   | 3.6  | 92.1  | 101   | 3.6  | 0.897                     |
| Conduction disorders and arrhythmias                                      | 17                                                                            | 8.1  | 10.8 | 141  | 5.5  | 89.2  | 158   | 5.7  | 0.121                     |
| Cerebrovascular diseases                                                  | 12                                                                            | 5.7  | 6.6  | 171  | 6.7  | 93.4  | 183   | 6.6  | 0.586                     |
| Vascular diseases                                                         | 8                                                                             | 3.8  | 11.3 | 63   | 2.5  | 88.7  | 71    | 2.6  | 0.235                     |
| Vascular diseases at index admission                                      | 7                                                                             | 3.3  | 5.7  | 115  | 4.5  | 94.3  | 122   | 4.4  | 0.430                     |
| Chronic obstructive pulmonary disease (COPD)                              | 5                                                                             | 2.4  | 10.0 | 45   | 1.8  | 90.0  | 50    | 1.8  | 0.516                     |
| Chronic nephropathy                                                       | 9                                                                             | 4.3  | 12.3 | 64   | 2.5  | 87.7  | 73    | 2.6  | 0.121                     |
| Chronic nephropathy at index admission                                    | 14                                                                            | 6.7  | 13.9 | 87   | 3.4  | 86.1  | 101   | 3.6  | 0.015                     |
| Chronic kidney disease                                                    | 3                                                                             | 1.4  | 15.8 | 16   | 0.6  | 84.2  | 19    | 0.7  | 0.175                     |
| Diseases chronic diseases (liver, pancreas, intestine)                    | 2                                                                             | 1.0  | 9.1  | 20   | 0.8  | 90.9  | 22    | 0.8  | 0.789                     |
| Diseases chronic diseases (liver, pancreas, intestine) at index admission | 3                                                                             | 1.4  | 5.0  | 57   | 2.2  | 95.0  | 60    | 2.2  | 0.444                     |
| Cerebrovascular revascularization                                         |                                                                               |      |      | 12   | 0.5  | 100.0 | 12    | 0.4  | 0.320                     |
| Other heart surgery                                                       | 3                                                                             | 1.4  | 11.5 | 23   | 0.9  | 88.5  | 26    | 0.9  | 0.445                     |
| Other vessel surgery                                                      | 8                                                                             | 3.8  | 13.1 | 53   | 2.1  | 86.9  | 61    | 2.2  | 0.099                     |
| Type of hospital*                                                         |                                                                               |      |      |      |      |       |       |      | 0.624                     |
| noNVT                                                                     | 6                                                                             | 2.9  | 9.4  | 58   | 2.3  | 90.6  | 64    | 2.3  |                           |
| NVT                                                                       | 8                                                                             | 3.8  | 9.6  | 75   | 2.9  | 90.4  | 83    | 3.0  |                           |
| NTUI                                                                      | 110                                                                           | 52.4 | 7.9  | 1274 | 49.8 | 92.1  | 1384  | 50.0 |                           |
| NTUII                                                                     | 86                                                                            | 41.0 | 7.0  | 1151 | 45.0 | 93.0  | 1237  | 44.7 |                           |

\*noNVT: Hospital without Neurovascular Treatment Team;

NVT: Hospital with a Neurovascular Treatment Team;

NTUI: Neurovascular Treatment Unit level I;

NTUII: Neurovascular Treatment Unit level II.
